# Supplementary material for: Impact of Fusarium Infection on Potato Quality, Starch Digestibility, In Vitro Glycemic Response, and Resistant Starch Content
Source: MDPI journal article supplement (doi:10.3390/jof9040466), 2023-04-12
Supplement: s1 [file s1]

### Supplementary tables:

Table S1: Tukey multiple comparison test for lesion diameter of Kufri Jyoti when infected with control (water agar), *Fusarium Sambucinum*, *Fusarium solani* and *Fusarium Sambucinum* + *Fusarium solani* and incubated for 0 d, 20 d, 40 d and 60 days

| Tukey's multiple comparisons test | Mean Diff. | 95.00% CI of diff. | Significant? | Summary | Adjusted P Value |
|-----------------------------------|------------|--------------------|--------------|---------|------------------|
| Control:0 d vs. Control:20 d      | -1.1E-14   | -2.498 to 2.498    | No           | ns      | >0.9999          |
| Control:0 d vs. Control:40 d      | -1.1E-14   | -2.498 to 2.498    | No           | ns      | >0.9999          |
| Control:0 d vs. Control:60 d      | -1.1E-14   | -2.498 to 2.498    | No           | ns      | >0.9999          |
| Control:0 d vs. FSam:0 d          | -3.6E-15   | -2.498 to 2.498    | No           | ns      | >0.9999          |
| Control:0 d vs. FSam:20 d         | -13.73     | -16.23 to -11.24   | Yes          | ****    | <0.0001          |
| Control:0 d vs. FSam:40 d         | -25.5      | -28.00 to -23.00   | Yes          | ****    | <0.0001          |
| Control:0 d vs. FSam:60 d         | -39.6      | -42.10 to -37.10   | Yes          | ****    | <0.0001          |
| Control:0 d vs. FSol:0 d          | -1.1E-14   | -2.498 to 2.498    | No           | ns      | >0.9999          |
| Control:0 d vs. FSol:20 d         | -11.87     | -14.36 to -9.369   | Yes          | ****    | <0.0001          |
| Control:0 d vs. FSol:40 d         | -20.73     | -23.23 to -18.24   | Yes          | ****    | <0.0001          |
| Control:0 d vs. FSol:60 d         | -27.57     | -30.06 to -25.07   | Yes          | ****    | <0.0001          |
| Control:0 d vs. FSam+FSol:0 d     | -1.1E-14   | -2.498 to 2.498    | No           | ns      | >0.9999          |
| Control:0 d vs. FSam+FSol:20 d    | -15.07     | -17.56 to -12.57   | Yes          | ****    | <0.0001          |
| Control:0 d vs. FSam+FSol:40 d    | -27.7      | -30.20 to -25.20   | Yes          | ****    | <0.0001          |
| Control:0 d vs. FSam+FSol:60 d    | -40.83     | -43.33 to -38.34   | Yes          | ****    | <0.0001          |
| Control:20 d vs. Control:40 d     | 0          | -2.498 to 2.498    | No           | ns      | >0.9999          |
| Control:20 d vs. Control:60 d     | 0          | -2.498 to 2.498    | No           | ns      | >0.9999          |
| Control:20 d vs. FSam:0 d         | 7.11E-15   | -2.498 to 2.498    | No           | ns      | >0.9999          |
| Control:20 d vs. FSam:20 d        | -13.73     | -16.23 to -11.24   | Yes          | ****    | <0.0001          |
| Control:20 d vs. FSam:40 d        | -25.5      | -28.00 to -23.00   | Yes          | ****    | <0.0001          |
| Control:20 d vs. FSam:60 d        | -39.6      | -42.10 to -37.10   | Yes          | ****    | <0.0001          |
| Control:20 d vs. FSol:0 d         | 0          | -2.498 to 2.498    | No           | ns      | >0.9999          |

|                                 |          |                  |     |      |         |
|---------------------------------|----------|------------------|-----|------|---------|
| Control:20 d vs. FSol:20 d      | -11.87   | -14.36 to -9.369 | Yes | **** | <0.0001 |
| Control:20 d vs. FSol:40 d      | -20.73   | -23.23 to -18.24 | Yes | **** | <0.0001 |
| Control:20 d vs. FSol:60 d      | -27.57   | -30.06 to -25.07 | Yes | **** | <0.0001 |
| Control:20 d vs. FSam+FSol:0 d  | 0        | -2.498 to 2.498  | No  | ns   | >0.9999 |
| Control:20 d vs. FSam+FSol:20 d | -15.07   | -17.56 to -12.57 | Yes | **** | <0.0001 |
| Control:20 d vs. FSam+FSol:40 d | -27.7    | -30.20 to -25.20 | Yes | **** | <0.0001 |
| Control:20 d vs. FSam+FSol:60 d | -40.83   | -43.33 to -38.34 | Yes | **** | <0.0001 |
| Control:40 d vs. Control:60 d   | 0        | -2.498 to 2.498  | No  | ns   | >0.9999 |
| Control:40 d vs. FSam:0 d       | 7.11E-15 | -2.498 to 2.498  | No  | ns   | >0.9999 |
| Control:40 d vs. FSam:20 d      | -13.73   | -16.23 to -11.24 | Yes | **** | <0.0001 |
| Control:40 d vs. FSam:40 d      | -25.5    | -28.00 to -23.00 | Yes | **** | <0.0001 |
| Control:40 d vs. FSam:60 d      | -39.6    | -42.10 to -37.10 | Yes | **** | <0.0001 |
| Control:40 d vs. FSol:0 d       | 0        | -2.498 to 2.498  | No  | ns   | >0.9999 |
| Control:40 d vs. FSol:20 d      | -11.87   | -14.36 to -9.369 | Yes | **** | <0.0001 |
| Control:40 d vs. FSol:40 d      | -20.73   | -23.23 to -18.24 | Yes | **** | <0.0001 |
| Control:40 d vs. FSol:60 d      | -27.57   | -30.06 to -25.07 | Yes | **** | <0.0001 |
| Control:40 d vs. FSam+FSol:0 d  | 0        | -2.498 to 2.498  | No  | ns   | >0.9999 |
| Control:40 d vs. FSam+FSol:20 d | -15.07   | -17.56 to -12.57 | Yes | **** | <0.0001 |
| Control:40 d vs. FSam+FSol:40 d | -27.7    | -30.20 to -25.20 | Yes | **** | <0.0001 |
| Control:40 d vs. FSam+FSol:60 d | -40.83   | -43.33 to -38.34 | Yes | **** | <0.0001 |
| Control:60 d vs. FSam:0 d       | 7.11E-15 | -2.498 to 2.498  | No  | ns   | >0.9999 |
| Control:60 d vs. FSam:20 d      | -13.73   | -16.23 to -11.24 | Yes | **** | <0.0001 |
| Control:60 d vs. FSam:40 d      | -25.5    | -28.00 to -23.00 | Yes | **** | <0.0001 |
| Control:60 d vs. FSam:60 d      | -39.6    | -42.10 to -37.10 | Yes | **** | <0.0001 |
| Control:60 d vs. FSol:0 d       | 0        | -2.498 to 2.498  | No  | ns   | >0.9999 |
| Control:60 d vs. FSol:20 d      | -11.87   | -14.36 to -9.369 | Yes | **** | <0.0001 |
| Control:60 d vs. FSol:40 d      | -20.73   | -23.23 to -18.24 | Yes | **** | <0.0001 |

|                                 |          |                  |     |      |         |
|---------------------------------|----------|------------------|-----|------|---------|
| Control:60 d vs. FSol:60 d      | -27.57   | -30.06 to -25.07 | Yes | **** | <0.0001 |
| Control:60 d vs. FSam+FSol:0 d  | 0        | -2.498 to 2.498  | No  | ns   | >0.9999 |
| Control:60 d vs. FSam+FSol:20 d | -15.07   | -17.56 to -12.57 | Yes | **** | <0.0001 |
| Control:60 d vs. FSam+FSol:40 d | -27.7    | -30.20 to -25.20 | Yes | **** | <0.0001 |
| Control:60 d vs. FSam+FSol:60 d | -40.83   | -43.33 to -38.34 | Yes | **** | <0.0001 |
| FSam:0 d vs. FSam:20 d          | -13.73   | -16.23 to -11.24 | Yes | **** | <0.0001 |
| FSam:0 d vs. FSam:40 d          | -25.5    | -28.00 to -23.00 | Yes | **** | <0.0001 |
| FSam:0 d vs. FSam:60 d          | -39.6    | -42.10 to -37.10 | Yes | **** | <0.0001 |
| FSam:0 d vs. FSol:0 d           | -7.1E-15 | -2.498 to 2.498  | No  | ns   | >0.9999 |
| FSam:0 d vs. FSol:20 d          | -11.87   | -14.36 to -9.369 | Yes | **** | <0.0001 |
| FSam:0 d vs. FSol:40 d          | -20.73   | -23.23 to -18.24 | Yes | **** | <0.0001 |
| FSam:0 d vs. FSol:60 d          | -27.57   | -30.06 to -25.07 | Yes | **** | <0.0001 |
| FSam:0 d vs. FSam+FSol:0 d      | -7.1E-15 | -2.498 to 2.498  | No  | ns   | >0.9999 |
| FSam:0 d vs. FSam+FSol:20 d     | -15.07   | -17.56 to -12.57 | Yes | **** | <0.0001 |
| FSam:0 d vs. FSam+FSol:40 d     | -27.7    | -30.20 to -25.20 | Yes | **** | <0.0001 |
| FSam:0 d vs. FSam+FSol:60 d     | -40.83   | -43.33 to -38.34 | Yes | **** | <0.0001 |
| FSam:20 d vs. FSam:40 d         | -11.77   | -14.26 to -9.269 | Yes | **** | <0.0001 |
| FSam:20 d vs. FSam:60 d         | -25.87   | -28.36 to -23.37 | Yes | **** | <0.0001 |
| FSam:20 d vs. FSol:0 d          | 13.73    | 11.24 to 16.23   | Yes | **** | <0.0001 |
| FSam:20 d vs. FSol:20 d         | 1.867    | -0.6311 to 4.364 | No  | ns   | 0.3333  |
| FSam:20 d vs. FSol:40 d         | -7       | -9.498 to -4.502 | Yes | **** | <0.0001 |
| FSam:20 d vs. FSol:60 d         | -13.83   | -16.33 to -11.34 | Yes | **** | <0.0001 |
| FSam:20 d vs. FSam+FSol:0 d     | 13.73    | 11.24 to 16.23   | Yes | **** | <0.0001 |
| FSam:20 d vs. FSam+FSol:20 d    | -1.333   | -3.831 to 1.164  | No  | ns   | 0.8189  |
| FSam:20 d vs. FSam+FSol:40 d    | -13.97   | -16.46 to -11.47 | Yes | **** | <0.0001 |
| FSam:20 d vs. FSam+FSol:60 d    | -27.1    | -29.60 to -24.60 | Yes | **** | <0.0001 |
| FSam:40 d vs. FSam:60 d         | -14.1    | -16.60 to -11.60 | Yes | **** | <0.0001 |

|                              |        |                   |     |      |         |
|------------------------------|--------|-------------------|-----|------|---------|
| FSam:40 d vs. FSol:0 d       | 25.5   | 23.00 to 28.00    | Yes | **** | <0.0001 |
| FSam:40 d vs. FSol:20 d      | 13.63  | 11.14 to 16.13    | Yes | **** | <0.0001 |
| FSam:40 d vs. FSol:40 d      | 4.767  | 2.269 to 7.264    | Yes | **** | <0.0001 |
| FSam:40 d vs. FSol:60 d      | -2.067 | -4.564 to 0.4311  | No  | ns   | 0.1975  |
| FSam:40 d vs. FSam+FSol:0 d  | 25.5   | 23.00 to 28.00    | Yes | **** | <0.0001 |
| FSam:40 d vs. FSam+FSol:20 d | 10.43  | 7.936 to 12.93    | Yes | **** | <0.0001 |
| FSam:40 d vs. FSam+FSol:40 d | -2.2   | -4.698 to 0.2978  | No  | ns   | 0.1333  |
| FSam:40 d vs. FSam+FSol:60 d | -15.33 | -17.83 to -12.84  | Yes | **** | <0.0001 |
| FSam:60 d vs. FSol:0 d       | 39.6   | 37.10 to 42.10    | Yes | **** | <0.0001 |
| FSam:60 d vs. FSol:20 d      | 27.73  | 25.24 to 30.23    | Yes | **** | <0.0001 |
| FSam:60 d vs. FSol:40 d      | 18.87  | 16.37 to 21.36    | Yes | **** | <0.0001 |
| FSam:60 d vs. FSol:60 d      | 12.03  | 9.536 to 14.53    | Yes | **** | <0.0001 |
| FSam:60 d vs. FSam+FSol:0 d  | 39.6   | 37.10 to 42.10    | Yes | **** | <0.0001 |
| FSam:60 d vs. FSam+FSol:20 d | 24.53  | 22.04 to 27.03    | Yes | **** | <0.0001 |
| FSam:60 d vs. FSam+FSol:40 d | 11.9   | 9.402 to 14.40    | Yes | **** | <0.0001 |
| FSam:60 d vs. FSam+FSol:60 d | -1.233 | -3.731 to 1.264   | No  | ns   | 0.8869  |
| FSol:0 d vs. FSol:20 d       | -11.87 | -14.36 to -9.369  | Yes | **** | <0.0001 |
| FSol:0 d vs. FSol:40 d       | -20.73 | -23.23 to -18.24  | Yes | **** | <0.0001 |
| FSol:0 d vs. FSol:60 d       | -27.57 | -30.06 to -25.07  | Yes | **** | <0.0001 |
| FSol:0 d vs. FSam+FSol:0 d   | 0      | -2.498 to 2.498   | No  | ns   | >0.9999 |
| FSol:0 d vs. FSam+FSol:20 d  | -15.07 | -17.56 to -12.57  | Yes | **** | <0.0001 |
| FSol:0 d vs. FSam+FSol:40 d  | -27.7  | -30.20 to -25.20  | Yes | **** | <0.0001 |
| FSol:0 d vs. FSam+FSol:60 d  | -40.83 | -43.33 to -38.34  | Yes | **** | <0.0001 |
| FSol:20 d vs. FSol:40 d      | -8.867 | -11.36 to -6.369  | Yes | **** | <0.0001 |
| FSol:20 d vs. FSol:60 d      | -15.7  | -18.20 to -13.20  | Yes | **** | <0.0001 |
| FSol:20 d vs. FSam+FSol:0 d  | 11.87  | 9.369 to 14.36    | Yes | **** | <0.0001 |
| FSol:20 d vs. FSam+FSol:20 d | -3.2   | -5.698 to -0.7022 | Yes | **   | 0.0035  |

|                                   |         |                  |     |      |         |
|-----------------------------------|---------|------------------|-----|------|---------|
| FSol:20 d vs. FSam+FSol:40 d      | -15.83  | -18.33 to -13.34 | Yes | **** | <0.0001 |
| FSol:20 d vs. FSam+FSol:60 d      | -28.97  | -31.46 to -26.47 | Yes | **** | <0.0001 |
| FSol:40 d vs. FSol:60 d           | -6.833  | -9.331 to -4.336 | Yes | **** | <0.0001 |
| FSol:40 d vs. FSam+FSol:0 d       | 20.73   | 18.24 to 23.23   | Yes | **** | <0.0001 |
| FSol:40 d vs. FSam+FSol:20 d      | 5.667   | 3.169 to 8.164   | Yes | **** | <0.0001 |
| FSol:40 d vs. FSam+FSol:40 d      | -6.967  | -9.464 to -4.469 | Yes | **** | <0.0001 |
| FSol:40 d vs. FSam+FSol:60 d      | -20.1   | -22.60 to -17.60 | Yes | **** | <0.0001 |
| FSol:60 d vs. FSam+FSol:0 d       | 27.57   | 25.07 to 30.06   | Yes | **** | <0.0001 |
| FSol:60 d vs. FSam+FSol:20 d      | 12.5    | 10.00 to 15.00   | Yes | **** | <0.0001 |
| FSol:60 d vs. FSam+FSol:40 d      | -0.1333 | -2.631 to 2.364  | No  | ns   | >0.9999 |
| FSol:60 d vs. FSam+FSol:60 d      | -13.27  | -15.76 to -10.77 | Yes | **** | <0.0001 |
| FSam+FSol:0 d vs. FSam+FSol:20 d  | -15.07  | -17.56 to -12.57 | Yes | **** | <0.0001 |
| FSam+FSol:0 d vs. FSam+FSol:40 d  | -27.7   | -30.20 to -25.20 | Yes | **** | <0.0001 |
| FSam+FSol:0 d vs. FSam+FSol:60 d  | -40.83  | -43.33 to -38.34 | Yes | **** | <0.0001 |
| FSam+FSol:20 d vs. FSam+FSol:40 d | -12.63  | -15.13 to -10.14 | Yes | **** | <0.0001 |
| FSam+FSol:20 d vs. FSam+FSol:60 d | -25.77  | -28.26 to -23.27 | Yes | **** | <0.0001 |
| FSam+FSol:40 d vs. FSam+FSol:60 d | -13.13  | -15.63 to -10.64 | Yes | **** | <0.0001 |

Table S2: Tukey multiple comparison test for lesion diameter of Kufri Frysona when infected with control (water agar), *Fusarium Sambucinum*, *Fusarium solani* and *Fusarium Sambucinum* + *Fusarium solani* and incubated for 0 d, 20 d, 40 d and 60 days

| Tukey's multiple comparisons test | Mean Diff. | 95.00% CI of diff. | Significant ? | Summary | Adjusted P Value |
|-----------------------------------|------------|--------------------|---------------|---------|------------------|
| Control:0 d vs. Control:20 d      | 7.11E-15   | -2.250 to 2.250    | No            | ns      | >0.9999          |
| Control:0 d vs. Control:40 d      | 0          | -2.250 to 2.250    | No            | ns      | >0.9999          |
| Control:0 d vs. Control:60 d      | 0          | -2.250 to 2.250    | No            | ns      | >0.9999          |
| Control:0 d vs. FSam:0 d          | 0          | -2.250 to 2.250    | No            | ns      | >0.9999          |
| Control:0 d vs. FSam:20 d         | -12.27     | -14.52 to -10.02   | Yes           | ****    | <0.0001          |

|                                 |          |                  |     |      |         |
|---------------------------------|----------|------------------|-----|------|---------|
| Control:0 d vs. FSam:40 d       | -20      | -22.25 to -17.75 | Yes | **** | <0.0001 |
| Control:0 d vs. FSam:60 d       | -24.87   | -27.12 to -22.62 | Yes | **** | <0.0001 |
| Control:0 d vs. FSol:0 d        | -5.3E-15 | -2.250 to 2.250  | No  | ns   | >0.9999 |
| Control:0 d vs. FSol:20 d       | -10.23   | -12.48 to -7.983 | Yes | **** | <0.0001 |
| Control:0 d vs. FSol:40 d       | -16.37   | -18.62 to -14.12 | Yes | **** | <0.0001 |
| Control:0 d vs. FSol:60 d       | -25.03   | -27.28 to -22.78 | Yes | **** | <0.0001 |
| Control:0 d vs. FSam+FSol:0 d   | 0        | -2.250 to 2.250  | No  | ns   | >0.9999 |
| Control:0 d vs. FSam+FSol:20 d  | -12.97   | -15.22 to -10.72 | Yes | **** | <0.0001 |
| Control:0 d vs. FSam+FSol:40 d  | -21.6    | -23.85 to -19.35 | Yes | **** | <0.0001 |
| Control:0 d vs. FSam+FSol:60 d  | -33.3    | -35.55 to -31.05 | Yes | **** | <0.0001 |
| Control:20 d vs. Control:40 d   | -7.1E-15 | -2.250 to 2.250  | No  | ns   | >0.9999 |
| Control:20 d vs. Control:60 d   | -7.1E-15 | -2.250 to 2.250  | No  | ns   | >0.9999 |
| Control:20 d vs. FSam:0 d       | -7.1E-15 | -2.250 to 2.250  | No  | ns   | >0.9999 |
| Control:20 d vs. FSam:20 d      | -12.27   | -14.52 to -10.02 | Yes | **** | <0.0001 |
| Control:20 d vs. FSam:40 d      | -20      | -22.25 to -17.75 | Yes | **** | <0.0001 |
| Control:20 d vs. FSam:60 d      | -24.87   | -27.12 to -22.62 | Yes | **** | <0.0001 |
| Control:20 d vs. FSol:0 d       | -1.2E-14 | -2.250 to 2.250  | No  | ns   | >0.9999 |
| Control:20 d vs. FSol:20 d      | -10.23   | -12.48 to -7.983 | Yes | **** | <0.0001 |
| Control:20 d vs. FSol:40 d      | -16.37   | -18.62 to -14.12 | Yes | **** | <0.0001 |
| Control:20 d vs. FSol:60 d      | -25.03   | -27.28 to -22.78 | Yes | **** | <0.0001 |
| Control:20 d vs. FSam+FSol:0 d  | -7.1E-15 | -2.250 to 2.250  | No  | ns   | >0.9999 |
| Control:20 d vs. FSam+FSol:20 d | -12.97   | -15.22 to -10.72 | Yes | **** | <0.0001 |
| Control:20 d vs. FSam+FSol:40 d | -21.6    | -23.85 to -19.35 | Yes | **** | <0.0001 |
| Control:20 d vs. FSam+FSol:60 d | -33.3    | -35.55 to -31.05 | Yes | **** | <0.0001 |
| Control:40 d vs. Control:60 d   | 0        | -2.250 to 2.250  | No  | ns   | >0.9999 |
| Control:40 d vs. FSam:0 d       | 0        | -2.250 to 2.250  | No  | ns   | >0.9999 |
| Control:40 d vs. FSam:20 d      | -12.27   | -14.52 to -10.02 | Yes | **** | <0.0001 |

|                                 |          |                  |     |      |         |
|---------------------------------|----------|------------------|-----|------|---------|
| Control:40 d vs. FSam:40 d      | -20      | -22.25 to -17.75 | Yes | **** | <0.0001 |
| Control:40 d vs. FSam:60 d      | -24.87   | -27.12 to -22.62 | Yes | **** | <0.0001 |
| Control:40 d vs. FSol:0 d       | -5.3E-15 | -2.250 to 2.250  | No  | ns   | >0.9999 |
| Control:40 d vs. FSol:20 d      | -10.23   | -12.48 to -7.983 | Yes | **** | <0.0001 |
| Control:40 d vs. FSol:40 d      | -16.37   | -18.62 to -14.12 | Yes | **** | <0.0001 |
| Control:40 d vs. FSol:60 d      | -25.03   | -27.28 to -22.78 | Yes | **** | <0.0001 |
| Control:40 d vs. FSam+FSol:0 d  | 0        | -2.250 to 2.250  | No  | ns   | >0.9999 |
| Control:40 d vs. FSam+FSol:20 d | -12.97   | -15.22 to -10.72 | Yes | **** | <0.0001 |
| Control:40 d vs. FSam+FSol:40 d | -21.6    | -23.85 to -19.35 | Yes | **** | <0.0001 |
| Control:40 d vs. FSam+FSol:60 d | -33.3    | -35.55 to -31.05 | Yes | **** | <0.0001 |
| Control:60 d vs. FSam:0 d       | 0        | -2.250 to 2.250  | No  | ns   | >0.9999 |
| Control:60 d vs. FSam:20 d      | -12.27   | -14.52 to -10.02 | Yes | **** | <0.0001 |
| Control:60 d vs. FSam:40 d      | -20      | -22.25 to -17.75 | Yes | **** | <0.0001 |
| Control:60 d vs. FSam:60 d      | -24.87   | -27.12 to -22.62 | Yes | **** | <0.0001 |
| Control:60 d vs. FSol:0 d       | -5.3E-15 | -2.250 to 2.250  | No  | ns   | >0.9999 |
| Control:60 d vs. FSol:20 d      | -10.23   | -12.48 to -7.983 | Yes | **** | <0.0001 |
| Control:60 d vs. FSol:40 d      | -16.37   | -18.62 to -14.12 | Yes | **** | <0.0001 |
| Control:60 d vs. FSol:60 d      | -25.03   | -27.28 to -22.78 | Yes | **** | <0.0001 |
| Control:60 d vs. FSam+FSol:0 d  | 0        | -2.250 to 2.250  | No  | ns   | >0.9999 |
| Control:60 d vs. FSam+FSol:20 d | -12.97   | -15.22 to -10.72 | Yes | **** | <0.0001 |
| Control:60 d vs. FSam+FSol:40 d | -21.6    | -23.85 to -19.35 | Yes | **** | <0.0001 |
| Control:60 d vs. FSam+FSol:60 d | -33.3    | -35.55 to -31.05 | Yes | **** | <0.0001 |
| FSam:0 d vs. FSam:20 d          | -12.27   | -14.52 to -10.02 | Yes | **** | <0.0001 |
| FSam:0 d vs. FSam:40 d          | -20      | -22.25 to -17.75 | Yes | **** | <0.0001 |
| FSam:0 d vs. FSam:60 d          | -24.87   | -27.12 to -22.62 | Yes | **** | <0.0001 |
| FSam:0 d vs. FSol:0 d           | -5.3E-15 | -2.250 to 2.250  | No  | ns   | >0.9999 |
| FSam:0 d vs. FSol:20 d          | -10.23   | -12.48 to -7.983 | Yes | **** | <0.0001 |

|                              |         |                  |     |      |         |
|------------------------------|---------|------------------|-----|------|---------|
| FSam:0 d vs. FSol:40 d       | -16.37  | -18.62 to -14.12 | Yes | **** | <0.0001 |
| FSam:0 d vs. FSol:60 d       | -25.03  | -27.28 to -22.78 | Yes | **** | <0.0001 |
| FSam:0 d vs. FSam+FSol:0 d   | 0       | -2.250 to 2.250  | No  | ns   | >0.9999 |
| FSam:0 d vs. FSam+FSol:20 d  | -12.97  | -15.22 to -10.72 | Yes | **** | <0.0001 |
| FSam:0 d vs. FSam+FSol:40 d  | -21.6   | -23.85 to -19.35 | Yes | **** | <0.0001 |
| FSam:0 d vs. FSam+FSol:60 d  | -33.3   | -35.55 to -31.05 | Yes | **** | <0.0001 |
| FSam:20 d vs. FSam:40 d      | -7.733  | -9.984 to -5.483 | Yes | **** | <0.0001 |
| FSam:20 d vs. FSam:60 d      | -12.6   | -14.85 to -10.35 | Yes | **** | <0.0001 |
| FSam:20 d vs. FSol:0 d       | 12.27   | 10.02 to 14.52   | Yes | **** | <0.0001 |
| FSam:20 d vs. FSol:20 d      | 2.033   | -0.2171 to 4.284 | No  | ns   | 0.1117  |
| FSam:20 d vs. FSol:40 d      | -4.1    | -6.350 to -1.850 | Yes | **** | <0.0001 |
| FSam:20 d vs. FSol:60 d      | -12.77  | -15.02 to -10.52 | Yes | **** | <0.0001 |
| FSam:20 d vs. FSam+FSol:0 d  | 12.27   | 10.02 to 14.52   | Yes | **** | <0.0001 |
| FSam:20 d vs. FSam+FSol:20 d | -0.7    | -2.950 to 1.550  | No  | ns   | 0.9979  |
| FSam:20 d vs. FSam+FSol:40 d | -9.333  | -11.58 to -7.083 | Yes | **** | <0.0001 |
| FSam:20 d vs. FSam+FSol:60 d | -21.03  | -23.28 to -18.78 | Yes | **** | <0.0001 |
| FSam:40 d vs. FSam:60 d      | -4.867  | -7.117 to -2.616 | Yes | **** | <0.0001 |
| FSam:40 d vs. FSol:0 d       | 20      | 17.75 to 22.25   | Yes | **** | <0.0001 |
| FSam:40 d vs. FSol:20 d      | 9.767   | 7.516 to 12.02   | Yes | **** | <0.0001 |
| FSam:40 d vs. FSol:40 d      | 3.633   | 1.383 to 5.884   | Yes | ***  | 0.0001  |
| FSam:40 d vs. FSol:60 d      | -5.033  | -7.284 to -2.783 | Yes | **** | <0.0001 |
| FSam:40 d vs. FSam+FSol:0 d  | 20      | 17.75 to 22.25   | Yes | **** | <0.0001 |
| FSam:40 d vs. FSam+FSol:20 d | 7.033   | 4.783 to 9.284   | Yes | **** | <0.0001 |
| FSam:40 d vs. FSam+FSol:40 d | -1.6    | -3.850 to 0.6505 | No  | ns   | 0.4101  |
| FSam:40 d vs. FSam+FSol:60 d | -13.3   | -15.55 to -11.05 | Yes | **** | <0.0001 |
| FSam:60 d vs. FSol:0 d       | 24.87   | 22.62 to 27.12   | Yes | **** | <0.0001 |
| FSam:60 d vs. FSol:20 d      | 14.63   | 12.38 to 16.88   | Yes | **** | <0.0001 |
| FSam:60 d vs. FSol:40 d      | 8.5     | 6.250 to 10.75   | Yes | **** | <0.0001 |
| FSam:60 d vs. FSol:60 d      | -0.1667 | -2.417 to 2.084  | No  | ns   | >0.9999 |
| FSam:60 d vs. FSam+FSol:0 d  | 24.87   | 22.62 to 27.12   | Yes | **** | <0.0001 |
| FSam:60 d vs. FSam+FSol:20 d | 11.9    | 9.650 to 14.15   | Yes | **** | <0.0001 |
| FSam:60 d vs. FSam+FSol:40 d | 3.267   | 1.016 to 5.517   | Yes | ***  | 0.0006  |



|                                   |          |                   |     |      |         |
|-----------------------------------|----------|-------------------|-----|------|---------|
| FSam:60 d vs. FSam+FSol:60 d      | -8.433   | -10.68 to -6.183  | Yes | **** | <0.0001 |
| FSol:0 d vs. FSol:20 d            | -10.23   | -12.48 to -7.983  | Yes | **** | <0.0001 |
| FSol:0 d vs. FSol:40 d            | -16.37   | -18.62 to -14.12  | Yes | **** | <0.0001 |
| FSol:0 d vs. FSol:60 d            | -25.03   | -27.28 to -22.78  | Yes | **** | <0.0001 |
| FSol:0 d vs. FSam+FSol:0 d        | 5.33E-15 | -2.250 to 2.250   | No  | ns   | >0.9999 |
| FSol:0 d vs. FSam+FSol:20 d       | -12.97   | -15.22 to -10.72  | Yes | **** | <0.0001 |
| FSol:0 d vs. FSam+FSol:40 d       | -21.6    | -23.85 to -19.35  | Yes | **** | <0.0001 |
| FSol:0 d vs. FSam+FSol:60 d       | -33.3    | -35.55 to -31.05  | Yes | **** | <0.0001 |
| FSol:20 d vs. FSol:40 d           | -6.133   | -8.384 to -3.883  | Yes | **** | <0.0001 |
| FSol:20 d vs. FSol:60 d           | -14.8    | -17.05 to -12.55  | Yes | **** | <0.0001 |
| FSol:20 d vs. FSam+FSol:0 d       | 10.23    | 7.983 to 12.48    | Yes | **** | <0.0001 |
| FSol:20 d vs. FSam+FSol:20 d      | -2.733   | -4.984 to -0.4829 | Yes | **   | 0.0067  |
| FSol:20 d vs. FSam+FSol:40 d      | -11.37   | -13.62 to -9.116  | Yes | **** | <0.0001 |
| FSol:20 d vs. FSam+FSol:60 d      | -23.07   | -25.32 to -20.82  | Yes | **** | <0.0001 |
| FSol:40 d vs. FSol:60 d           | -8.667   | -10.92 to -6.416  | Yes | **** | <0.0001 |
| FSol:40 d vs. FSam+FSol:0 d       | 16.37    | 14.12 to 18.62    | Yes | **** | <0.0001 |
| FSol:40 d vs. FSam+FSol:20 d      | 3.4      | 1.150 to 5.650    | Yes | ***  | 0.0003  |
| FSol:40 d vs. FSam+FSol:40 d      | -5.233   | -7.484 to -2.983  | Yes | **** | <0.0001 |
| FSol:40 d vs. FSam+FSol:60 d      | -16.93   | -19.18 to -14.68  | Yes | **** | <0.0001 |
| FSol:60 d vs. FSam+FSol:0 d       | 25.03    | 22.78 to 27.28    | Yes | **** | <0.0001 |
| FSol:60 d vs. FSam+FSol:20 d      | 12.07    | 9.816 to 14.32    | Yes | **** | <0.0001 |
| FSol:60 d vs. FSam+FSol:40 d      | 3.433    | 1.183 to 5.684    | Yes | ***  | 0.0003  |
| FSol:60 d vs. FSam+FSol:60 d      | -8.267   | -10.52 to -6.016  | Yes | **** | <0.0001 |
| FSam+FSol:0 d vs. FSam+FSol:20 d  | -12.97   | -15.22 to -10.72  | Yes | **** | <0.0001 |
| FSam+FSol:0 d vs. FSam+FSol:40 d  | -21.6    | -23.85 to -19.35  | Yes | **** | <0.0001 |
| FSam+FSol:0 d vs. FSam+FSol:60 d  | -33.3    | -35.55 to -31.05  | Yes | **** | <0.0001 |
| FSam+FSol:20 d vs. FSam+FSol:40 d | -8.633   | -10.88 to -6.383  | Yes | **** | <0.0001 |
| FSam+FSol:20 d vs. FSam+FSol:60 d | -20.33   | -22.58 to -18.08  | Yes | **** | <0.0001 |
| FSam+FSol:40 d vs. FSam+FSol:60 d | -11.7    | -13.95 to -9.450  | Yes | **** | <0.0001 |

Table S3: Tukey multiple comparison test for lesion depth of Kufri Jyoti when infected with control (water agar), *Fusarium Sambucinum*, *Fusarium solani* and *Fusarium Sambucinum* + *Fusarium solani* and incubated for 0 d, 20 d, 40 d and 60 days

| Tukey's multiple comparisons test | Mean Diff. | 95.00% CI of diff. | Significant ? | Summary | Adjusted P Value |
|-----------------------------------|------------|--------------------|---------------|---------|------------------|
| Control:0 d vs. Control:20 d      | -3.6E-15   | -2.400 to 2.400    | No            | ns      | >0.9999          |
| Control:0 d vs. Control:40 d      | -7.1E-15   | -2.400 to 2.400    | No            | ns      | >0.9999          |
| Control:0 d vs. Control:60 d      | -7.1E-15   | -2.400 to 2.400    | No            | ns      | >0.9999          |
| Control:0 d vs. FSam:0 d          | -7.1E-15   | -2.400 to 2.400    | No            | ns      | >0.9999          |
| Control:0 d vs. FSam:20 d         | -7.567     | -9.967 to -5.166   | Yes           | ****    | <0.0001          |
| Control:0 d vs. FSam:40 d         | -14.3      | -16.70 to -11.90   | Yes           | ****    | <0.0001          |
| Control:0 d vs. FSam:60 d         | -22.9      | -25.30 to -20.50   | Yes           | ****    | <0.0001          |
| Control:0 d vs. FSol:0 d          | -7.1E-15   | -2.400 to 2.400    | No            | ns      | >0.9999          |
| Control:0 d vs. FSol:20 d         | -5.233     | -7.634 to -2.833   | Yes           | ****    | <0.0001          |
| Control:0 d vs. FSol:40 d         | -9         | -11.40 to -6.600   | Yes           | ****    | <0.0001          |
| Control:0 d vs. FSol:60 d         | -14.53     | -16.93 to -12.13   | Yes           | ****    | <0.0001          |
| Control:0 d vs. FSam+FSol:0 d     | -7.1E-15   | -2.400 to 2.400    | No            | ns      | >0.9999          |
| Control:0 d vs. FSam+FSol:20 d    | -11.43     | -13.83 to -9.033   | Yes           | ****    | <0.0001          |
| Control:0 d vs. FSam+FSol:40 d    | -18.03     | -20.43 to -15.63   | Yes           | ****    | <0.0001          |
| Control:0 d vs. FSam+FSol:60 d    | -29.1      | -31.50 to -26.70   | Yes           | ****    | <0.0001          |
| Control:20 d vs. Control:40 d     | -3.6E-15   | -2.400 to 2.400    | No            | ns      | >0.9999          |
| Control:20 d vs. Control:60 d     | -3.6E-15   | -2.400 to 2.400    | No            | ns      | >0.9999          |
| Control:20 d vs. FSam:0 d         | -3.6E-15   | -2.400 to 2.400    | No            | ns      | >0.9999          |
| Control:20 d vs. FSam:20 d        | -7.567     | -9.967 to -5.166   | Yes           | ****    | <0.0001          |
| Control:20 d vs. FSam:40 d        | -14.3      | -16.70 to -11.90   | Yes           | ****    | <0.0001          |
| Control:20 d vs. FSam:60 d        | -22.9      | -25.30 to -20.50   | Yes           | ****    | <0.0001          |
| Control:20 d vs. FSol:0 d         | -3.6E-15   | -2.400 to 2.400    | No            | ns      | >0.9999          |

|                                 |          |                  |     |      |         |
|---------------------------------|----------|------------------|-----|------|---------|
| Control:20 d vs. FSol:20 d      | -5.233   | -7.634 to -2.833 | Yes | **** | <0.0001 |
| Control:20 d vs. FSol:40 d      | -9       | -11.40 to -6.600 | Yes | **** | <0.0001 |
| Control:20 d vs. FSol:60 d      | -14.53   | -16.93 to -12.13 | Yes | **** | <0.0001 |
| Control:20 d vs. FSam+FSol:0 d  | -3.6E-15 | -2.400 to 2.400  | No  | ns   | >0.9999 |
| Control:20 d vs. FSam+FSol:20 d | -11.43   | -13.83 to -9.033 | Yes | **** | <0.0001 |
| Control:20 d vs. FSam+FSol:40 d | -18.03   | -20.43 to -15.63 | Yes | **** | <0.0001 |
| Control:20 d vs. FSam+FSol:60 d | -29.1    | -31.50 to -26.70 | Yes | **** | <0.0001 |
| Control:40 d vs. Control:60 d   | 0        | -2.400 to 2.400  | No  | ns   | >0.9999 |
| Control:40 d vs. FSam:0 d       | 0        | -2.400 to 2.400  | No  | ns   | >0.9999 |
| Control:40 d vs. FSam:20 d      | -7.567   | -9.967 to -5.166 | Yes | **** | <0.0001 |
| Control:40 d vs. FSam:40 d      | -14.3    | -16.70 to -11.90 | Yes | **** | <0.0001 |
| Control:40 d vs. FSam:60 d      | -22.9    | -25.30 to -20.50 | Yes | **** | <0.0001 |
| Control:40 d vs. FSol:0 d       | 0        | -2.400 to 2.400  | No  | ns   | >0.9999 |
| Control:40 d vs. FSol:20 d      | -5.233   | -7.634 to -2.833 | Yes | **** | <0.0001 |
| Control:40 d vs. FSol:40 d      | -9       | -11.40 to -6.600 | Yes | **** | <0.0001 |
| Control:40 d vs. FSol:60 d      | -14.53   | -16.93 to -12.13 | Yes | **** | <0.0001 |
| Control:40 d vs. FSam+FSol:0 d  | 0        | -2.400 to 2.400  | No  | ns   | >0.9999 |
| Control:40 d vs. FSam+FSol:20 d | -11.43   | -13.83 to -9.033 | Yes | **** | <0.0001 |
| Control:40 d vs. FSam+FSol:40 d | -18.03   | -20.43 to -15.63 | Yes | **** | <0.0001 |
| Control:40 d vs. FSam+FSol:60 d | -29.1    | -31.50 to -26.70 | Yes | **** | <0.0001 |
| Control:60 d vs. FSam:0 d       | 0        | -2.400 to 2.400  | No  | ns   | >0.9999 |
| Control:60 d vs. FSam:20 d      | -7.567   | -9.967 to -5.166 | Yes | **** | <0.0001 |
| Control:60 d vs. FSam:40 d      | -14.3    | -16.70 to -11.90 | Yes | **** | <0.0001 |
| Control:60 d vs. FSam:60 d      | -22.9    | -25.30 to -20.50 | Yes | **** | <0.0001 |
| Control:60 d vs. FSol:0 d       | 0        | -2.400 to 2.400  | No  | ns   | >0.9999 |
| Control:60 d vs. FSol:20 d      | -5.233   | -7.634 to -2.833 | Yes | **** | <0.0001 |
| Control:60 d vs. FSol:40 d      | -9       | -11.40 to -6.600 | Yes | **** | <0.0001 |
| Control:60 d vs. FSol:60 d      | -14.53   | -16.93 to -12.13 | Yes | **** | <0.0001 |
| Control:60 d vs. FSam+FSol:0 d  | 0        | -2.400 to 2.400  | No  | ns   | >0.9999 |

|                                 |         |                   |     |      |         |
|---------------------------------|---------|-------------------|-----|------|---------|
| Control:60 d vs. FSam+FSol:20 d | -11.43  | -13.83 to -9.033  | Yes | **** | <0.0001 |
| Control:60 d vs. FSam+FSol:40 d | -18.03  | -20.43 to 15.63   | Yes | **** | <0.0001 |
| Control:60 d vs. FSam+FSol:60 d | -29.1   | -31.50 to 26.70   | Yes | **** | <0.0001 |
| FSam:0 d vs. FSam:20 d          | -7.567  | -9.967 to 5.166   | Yes | **** | <0.0001 |
| FSam:0 d vs. FSam:40 d          | -14.3   | -16.70 to 11.90   | Yes | **** | <0.0001 |
| FSam:0 d vs. FSam:60 d          | -22.9   | -25.30 to 20.50   | Yes | **** | <0.0001 |
| FSam:0 d vs. FSol:0 d           | 0       | -2.400 to 2.400   | No  | ns   | >0.9999 |
| FSam:0 d vs. FSol:20 d          | -5.233  | -7.634 to 2.833   | Yes | **** | <0.0001 |
| FSam:0 d vs. FSol:40 d          | -9      | -11.40 to 6.600   | Yes | **** | <0.0001 |
| FSam:0 d vs. FSol:60 d          | -14.53  | -16.93 to 12.13   | Yes | **** | <0.0001 |
| FSam:0 d vs. FSam+FSol:0 d      | 0       | -2.400 to 2.400   | No  | ns   | >0.9999 |
| FSam:0 d vs. FSam+FSol:20 d     | -11.43  | -13.83 to 9.033   | Yes | **** | <0.0001 |
| FSam:0 d vs. FSam+FSol:40 d     | -18.03  | -20.43 to 15.63   | Yes | **** | <0.0001 |
| FSam:0 d vs. FSam+FSol:60 d     | -29.1   | -31.50 to 26.70   | Yes | **** | <0.0001 |
| FSam:20 d vs. FSam:40 d         | -6.733  | -9.134 to 4.333   | Yes | **** | <0.0001 |
| FSam:20 d vs. FSam:60 d         | -15.33  | -17.73 to 12.93   | Yes | **** | <0.0001 |
| FSam:20 d vs. FSol:0 d          | 7.567   | 5.166 to 9.967    | Yes | **** | <0.0001 |
| FSam:20 d vs. FSol:20 d         | 2.333   | -0.06700 to 4.734 | No  | ns   | 0.0636  |
| FSam:20 d vs. FSol:40 d         | -1.433  | -3.834 to 0.9670  | No  | ns   | 0.6818  |
| FSam:20 d vs. FSol:60 d         | -6.967  | -9.367 to 4.566   | Yes | **** | <0.0001 |
| FSam:20 d vs. FSam+FSol:0 d     | 7.567   | 5.166 to 9.967    | Yes | **** | <0.0001 |
| FSam:20 d vs. FSam+FSol:20 d    | -3.867  | -6.267 to 1.466   | Yes | ***  | 0.0001  |
| FSam:20 d vs. FSam+FSol:40 d    | -10.47  | -12.87 to 8.066   | Yes | **** | <0.0001 |
| FSam:20 d vs. FSam+FSol:60 d    | -21.53  | -23.93 to 19.13   | Yes | **** | <0.0001 |
| FSam:40 d vs. FSam:60 d         | -8.6    | -11.00 to 6.200   | Yes | **** | <0.0001 |
| FSam:40 d vs. FSol:0 d          | 14.3    | 11.90 to 16.70    | Yes | **** | <0.0001 |
| FSam:40 d vs. FSol:20 d         | 9.067   | 6.666 to 11.47    | Yes | **** | <0.0001 |
| FSam:40 d vs. FSol:40 d         | 5.3     | 2.900 to 7.700    | Yes | **** | <0.0001 |
| FSam:40 d vs. FSol:60 d         | -0.2333 | -2.634 to 2.167   | No  | ns   | >0.9999 |
| FSam:40 d vs. FSam+FSol:0 d     | 14.3    | 11.90 to 16.70    | Yes | **** | <0.0001 |
| FSam:40 d vs. FSam+FSol:20 d    | 2.867   | 0.4663 to 5.267   | Yes | **   | 0.0082  |

|                              |        |                    |     |      |         |
|------------------------------|--------|--------------------|-----|------|---------|
| FSam:40 d vs. FSam+FSol:40 d | -3.733 | -6.134 to -1.333   | Yes | ***  | 0.0002  |
| FSam:40 d vs. FSam+FSol:60 d | -14.8  | -17.20 to -12.40   | Yes | **** | <0.0001 |
| FSam:60 d vs. FSol:0 d       | 22.9   | 20.50 to 25.30     | Yes | **** | <0.0001 |
| FSam:60 d vs. FSol:20 d      | 17.67  | 15.27 to 20.07     | Yes | **** | <0.0001 |
| FSam:60 d vs. FSol:40 d      | 13.9   | 11.50 to 16.30     | Yes | **** | <0.0001 |
| FSam:60 d vs. FSol:60 d      | 8.367  | 5.966 to 10.77     | Yes | **** | <0.0001 |
| FSam:60 d vs. FSam+FSol:0 d  | 22.9   | 20.50 to 25.30     | Yes | **** | <0.0001 |
| FSam:60 d vs. FSam+FSol:20 d | 11.47  | 9.066 to 13.87     | Yes | **** | <0.0001 |
| FSam:60 d vs. FSam+FSol:40 d | 4.867  | 2.466 to 7.267     | Yes | **** | <0.0001 |
| FSam:60 d vs. FSam+FSol:60 d | -6.2   | -8.600 to -3.800   | Yes | **** | <0.0001 |
| FSol:0 d vs. FSol:20 d       | -5.233 | -7.634 to -2.833   | Yes | **** | <0.0001 |
| FSol:0 d vs. FSol:40 d       | -9     | -11.40 to -6.600   | Yes | **** | <0.0001 |
| FSol:0 d vs. FSol:60 d       | -14.53 | -16.93 to -12.13   | Yes | **** | <0.0001 |
| FSol:0 d vs. FSam+FSol:0 d   | 0      | -2.400 to 2.400    | No  | ns   | >0.9999 |
| FSol:0 d vs. FSam+FSol:20 d  | -11.43 | -13.83 to -9.033   | Yes | **** | <0.0001 |
| FSol:0 d vs. FSam+FSol:40 d  | -18.03 | -20.43 to -15.63   | Yes | **** | <0.0001 |
| FSol:0 d vs. FSam+FSol:60 d  | -29.1  | -31.50 to -26.70   | Yes | **** | <0.0001 |
| FSol:20 d vs. FSol:40 d      | -3.767 | -6.167 to -1.366   | Yes | ***  | 0.0002  |
| FSol:20 d vs. FSol:60 d      | -9.3   | -11.70 to -6.900   | Yes | **** | <0.0001 |
| FSol:20 d vs. FSam+FSol:0 d  | 5.233  | 2.833 to 7.634     | Yes | **** | <0.0001 |
| FSol:20 d vs. FSam+FSol:20 d | -6.2   | -8.600 to -3.800   | Yes | **** | <0.0001 |
| FSol:20 d vs. FSam+FSol:40 d | -12.8  | -15.20 to -10.40   | Yes | **** | <0.0001 |
| FSol:20 d vs. FSam+FSol:60 d | -23.87 | -26.27 to -21.47   | Yes | **** | <0.0001 |
| FSol:40 d vs. FSol:60 d      | -5.533 | -7.934 to -3.133   | Yes | **** | <0.0001 |
| FSol:40 d vs. FSam+FSol:0 d  | 9      | 6.600 to 11.40     | Yes | **** | <0.0001 |
| FSol:40 d vs. FSam+FSol:20 d | -2.433 | -4.834 to -0.03300 | Yes | *    | 0.0443  |
| FSol:40 d vs. FSam+FSol:40 d | -9.033 | -11.43 to -6.633   | Yes | **** | <0.0001 |
| FSol:40 d vs. FSam+FSol:60 d | -20.1  | -22.50 to -17.70   | Yes | **** | <0.0001 |
| FSol:60 d vs. FSam+FSol:0 d  | 14.53  | 12.13 to 16.93     | Yes | **** | <0.0001 |
| FSol:60 d vs. FSam+FSol:20 d | 3.1    | 0.6997 to 5.500    | Yes | **   | 0.0031  |
| FSol:60 d vs. FSam+FSol:40 d | -3.5   | -5.900 to -1.100   | Yes | ***  | 0.0006  |
| FSol:60 d vs. FSam+FSol:60 d | -14.57 | -16.97 to -12.17   | Yes | **** | <0.0001 |

|                                   |        |                  |     |      |         |
|-----------------------------------|--------|------------------|-----|------|---------|
| FSam+FSol:0 d vs. FSam+FSol:20 d  | -11.43 | -13.83 to -9.033 | Yes | **** | <0.0001 |
| FSam+FSol:0 d vs. FSam+FSol:40 d  | -18.03 | -20.43 to 15.63  | Yes | **** | <0.0001 |
| FSam+FSol:0 d vs. FSam+FSol:60 d  | -29.1  | -31.50 to 26.70  | Yes | **** | <0.0001 |
| FSam+FSol:20 d vs. FSam+FSol:40 d | -6.6   | -9.000 to 4.200  | Yes | **** | <0.0001 |
| FSam+FSol:20 d vs. FSam+FSol:60 d | -17.67 | -20.07 to 15.27  | Yes | **** | <0.0001 |
| FSam+FSol:40 d vs. FSam+FSol:60 d | -11.07 | -13.47 to 8.666  | Yes | **** | <0.0001 |

Table S4: Tukey multiple comparison test for lesion depth of Kufri Frysona when infected with control (water agar), *Fusarium Sambucinum*, *Fusarium solani* and *Fusarium Sambucinum* + *Fusarium solani* and incubated for 0 d, 20 d, 40 d and 60 days

| Tukey's multiple comparisons test | Mean Diff. | 95.00% CI of diff. | Significant? | Summary | Adjusted P Value |
|-----------------------------------|------------|--------------------|--------------|---------|------------------|
| Control:0 d vs. Control:20 d      | 0          | -2.016 to 2.016    | No           | ns      | >0.9999          |
| Control:0 d vs. Control:40 d      | 0          | -2.016 to 2.016    | No           | ns      | >0.9999          |
| Control:0 d vs. Control:60 d      | -7.1E-15   | -2.016 to 2.016    | No           | ns      | >0.9999          |
| Control:0 d vs. FSam:0 d          | 3.55E-15   | -2.016 to 2.016    | No           | ns      | >0.9999          |
| Control:0 d vs. FSam:20 d         | -6.1       | -8.116 to -4.084   | Yes          | ****    | <0.0001          |
| Control:0 d vs. FSam:40 d         | -11.8      | -13.82 to -9.784   | Yes          | ****    | <0.0001          |
| Control:0 d vs. FSam:60 d         | -18.03     | -20.05 to -16.02   | Yes          | ****    | <0.0001          |
| Control:0 d vs. FSol:0 d          | 0          | -2.016 to 2.016    | No           | ns      | >0.9999          |
| Control:0 d vs. FSol:20 d         | -4.367     | -6.383 to -2.350   | Yes          | ****    | <0.0001          |
| Control:0 d vs. FSol:40 d         | -7.1       | -9.116 to -5.084   | Yes          | ****    | <0.0001          |
| Control:0 d vs. FSol:60 d         | -9.4       | -11.42 to -7.384   | Yes          | ****    | <0.0001          |
| Control:0 d vs. FSam+FSol:0 d     | 0          | -2.016 to 2.016    | No           | ns      | >0.9999          |
| Control:0 d vs. FSam+FSol:20 d    | -8.033     | -10.05 to -6.017   | Yes          | ****    | <0.0001          |
| Control:0 d vs. FSam+FSol:40 d    | -15.33     | -17.35 to -13.32   | Yes          | ****    | <0.0001          |
| Control:0 d vs. FSam+FSol:60 d    | -21.73     | -23.75 to -19.72   | Yes          | ****    | <0.0001          |
| Control:20 d vs. Control:40 d     | 0          | -2.016 to 2.016    | No           | ns      | >0.9999          |

|                                 |          |                  |     |      |         |
|---------------------------------|----------|------------------|-----|------|---------|
| Control:20 d vs. Control:60 d   | -7.1E-15 | -2.016 to 2.016  | No  | ns   | >0.9999 |
| Control:20 d vs. FSam:0 d       | 3.55E-15 | -2.016 to 2.016  | No  | ns   | >0.9999 |
| Control:20 d vs. FSam:20 d      | -6.1     | -8.116 to -4.084 | Yes | **** | <0.0001 |
| Control:20 d vs. FSam:40 d      | -11.8    | -13.82 to -9.784 | Yes | **** | <0.0001 |
| Control:20 d vs. FSam:60 d      | -18.03   | -20.05 to -16.02 | Yes | **** | <0.0001 |
| Control:20 d vs. FSol:0 d       | 0        | -2.016 to 2.016  | No  | ns   | >0.9999 |
| Control:20 d vs. FSol:20 d      | -4.367   | -6.383 to -2.350 | Yes | **** | <0.0001 |
| Control:20 d vs. FSol:40 d      | -7.1     | -9.116 to -5.084 | Yes | **** | <0.0001 |
| Control:20 d vs. FSol:60 d      | -9.4     | -11.42 to -7.384 | Yes | **** | <0.0001 |
| Control:20 d vs. FSam+FSol:0 d  | 0        | -2.016 to 2.016  | No  | ns   | >0.9999 |
| Control:20 d vs. FSam+FSol:20 d | -8.033   | -10.05 to -6.017 | Yes | **** | <0.0001 |
| Control:20 d vs. FSam+FSol:40 d | -15.33   | -17.35 to -13.32 | Yes | **** | <0.0001 |
| Control:20 d vs. FSam+FSol:60 d | -21.73   | -23.75 to -19.72 | Yes | **** | <0.0001 |
| Control:40 d vs. Control:60 d   | -7.1E-15 | -2.016 to 2.016  | No  | ns   | >0.9999 |
| Control:40 d vs. FSam:0 d       | 3.55E-15 | -2.016 to 2.016  | No  | ns   | >0.9999 |
| Control:40 d vs. FSam:20 d      | -6.1     | -8.116 to -4.084 | Yes | **** | <0.0001 |
| Control:40 d vs. FSam:40 d      | -11.8    | -13.82 to -9.784 | Yes | **** | <0.0001 |
| Control:40 d vs. FSam:60 d      | -18.03   | -20.05 to -16.02 | Yes | **** | <0.0001 |
| Control:40 d vs. FSol:0 d       | 0        | -2.016 to 2.016  | No  | ns   | >0.9999 |
| Control:40 d vs. FSol:20 d      | -4.367   | -6.383 to -2.350 | Yes | **** | <0.0001 |
| Control:40 d vs. FSol:40 d      | -7.1     | -9.116 to -5.084 | Yes | **** | <0.0001 |
| Control:40 d vs. FSol:60 d      | -9.4     | -11.42 to -7.384 | Yes | **** | <0.0001 |
| Control:40 d vs. FSam+FSol:0 d  | 0        | -2.016 to 2.016  | No  | ns   | >0.9999 |
| Control:40 d vs. FSam+FSol:20 d | -8.033   | -10.05 to -6.017 | Yes | **** | <0.0001 |
| Control:40 d vs. FSam+FSol:40 d | -15.33   | -17.35 to -13.32 | Yes | **** | <0.0001 |
| Control:40 d vs. FSam+FSol:60 d | -21.73   | -23.75 to -19.72 | Yes | **** | <0.0001 |
| Control:60 d vs. FSam:0 d       | 1.07E-14 | -2.016 to 2.016  | No  | ns   | >0.9999 |

|                                 |              |                  |      |     |      |         |
|---------------------------------|--------------|------------------|------|-----|------|---------|
| Control:60 d vs. FSam:20 d      | -6.1         | -8.116<br>4.084  | to - | Yes | **** | <0.0001 |
| Control:60 d vs. FSam:40 d      | -11.8        | -13.82<br>9.784  | to - | Yes | **** | <0.0001 |
| Control:60 d vs. FSam:60 d      | -18.03       | -20.05<br>16.02  | to - | Yes | **** | <0.0001 |
| Control:60 d vs. FSol:0 d       | 7.11E-<br>15 | -2.016<br>2.016  | to   | No  | ns   | >0.9999 |
| Control:60 d vs. FSol:20 d      | -4.367       | -6.383<br>2.350  | to - | Yes | **** | <0.0001 |
| Control:60 d vs. FSol:40 d      | -7.1         | -9.116<br>5.084  | to - | Yes | **** | <0.0001 |
| Control:60 d vs. FSol:60 d      | -9.4         | -11.42<br>7.384  | to - | Yes | **** | <0.0001 |
| Control:60 d vs. FSam+FSol:0 d  | 7.11E-<br>15 | -2.016<br>2.016  | to   | No  | ns   | >0.9999 |
| Control:60 d vs. FSam+FSol:20 d | -8.033       | -10.05<br>6.017  | to - | Yes | **** | <0.0001 |
| Control:60 d vs. FSam+FSol:40 d | -15.33       | -17.35<br>13.32  | to - | Yes | **** | <0.0001 |
| Control:60 d vs. FSam+FSol:60 d | -21.73       | -23.75<br>19.72  | to - | Yes | **** | <0.0001 |
| FSam:0 d vs. FSam:20 d          | -6.1         | -8.116<br>4.084  | to - | Yes | **** | <0.0001 |
| FSam:0 d vs. FSam:40 d          | -11.8        | -13.82<br>9.784  | to - | Yes | **** | <0.0001 |
| FSam:0 d vs. FSam:60 d          | -18.03       | -20.05<br>16.02  | to - | Yes | **** | <0.0001 |
| FSam:0 d vs. FSol:0 d           | -3.6E-<br>15 | -2.016<br>2.016  | to   | No  | ns   | >0.9999 |
| FSam:0 d vs. FSol:20 d          | -4.367       | -6.383<br>2.350  | to - | Yes | **** | <0.0001 |
| FSam:0 d vs. FSol:40 d          | -7.1         | -9.116<br>5.084  | to - | Yes | **** | <0.0001 |
| FSam:0 d vs. FSol:60 d          | -9.4         | -11.42<br>7.384  | to - | Yes | **** | <0.0001 |
| FSam:0 d vs. FSam+FSol:0 d      | -3.6E-<br>15 | -2.016<br>2.016  | to   | No  | ns   | >0.9999 |
| FSam:0 d vs. FSam+FSol:20 d     | -8.033       | -10.05<br>6.017  | to - | Yes | **** | <0.0001 |
| FSam:0 d vs. FSam+FSol:40 d     | -15.33       | -17.35<br>13.32  | to - | Yes | **** | <0.0001 |
| FSam:0 d vs. FSam+FSol:60 d     | -21.73       | -23.75<br>19.72  | to - | Yes | **** | <0.0001 |
| FSam:20 d vs. FSam:40 d         | -5.7         | -7.716<br>3.684  | to - | Yes | **** | <0.0001 |
| FSam:20 d vs. FSam:60 d         | -11.93       | -13.95<br>9.917  | to - | Yes | **** | <0.0001 |
| FSam:20 d vs. FSol:0 d          | 6.1          | 4.084 to 8.116   |      | Yes | **** | <0.0001 |
| FSam:20 d vs. FSol:20 d         | 1.733        | -0.2830<br>3.750 | to   | No  | ns   | 0.1563  |
| FSam:20 d vs. FSol:40 d         | -1           | -3.016<br>1.016  | to   | No  | ns   | 0.8837  |



|                              |        |                   |     |      |         |
|------------------------------|--------|-------------------|-----|------|---------|
| FSam:20 d vs. FSol:60 d      | -3.3   | -5.316 to -1.284  | Yes | **** | <0.0001 |
| FSam:20 d vs. FSam+FSol:0 d  | 6.1    | 4.084 to 8.116    | Yes | **** | <0.0001 |
| FSam:20 d vs. FSam+FSol:20 d | -1.933 | -3.950 to 0.08304 | No  | ns   | 0.0711  |
| FSam:20 d vs. FSam+FSol:40 d | -9.233 | -11.25 to -7.217  | Yes | **** | <0.0001 |
| FSam:20 d vs. FSam+FSol:60 d | -15.63 | -17.65 to -13.62  | Yes | **** | <0.0001 |
| FSam:40 d vs. FSam:60 d      | -6.233 | -8.250 to -4.217  | Yes | **** | <0.0001 |
| FSam:40 d vs. FSol:0 d       | 11.8   | 9.784 to 13.82    | Yes | **** | <0.0001 |
| FSam:40 d vs. FSol:20 d      | 7.433  | 5.417 to 9.450    | Yes | **** | <0.0001 |
| FSam:40 d vs. FSol:40 d      | 4.7    | 2.684 to 6.716    | Yes | **** | <0.0001 |
| FSam:40 d vs. FSol:60 d      | 2.4    | 0.3836 to 4.416   | Yes | **   | 0.0085  |
| FSam:40 d vs. FSam+FSol:0 d  | 11.8   | 9.784 to 13.82    | Yes | **** | <0.0001 |
| FSam:40 d vs. FSam+FSol:20 d | 3.767  | 1.750 to 5.783    | Yes | **** | <0.0001 |
| FSam:40 d vs. FSam+FSol:40 d | -3.533 | -5.550 to -1.517  | Yes | **** | <0.0001 |
| FSam:40 d vs. FSam+FSol:60 d | -9.933 | -11.95 to -7.917  | Yes | **** | <0.0001 |
| FSam:60 d vs. FSol:0 d       | 18.03  | 16.02 to 20.05    | Yes | **** | <0.0001 |
| FSam:60 d vs. FSol:20 d      | 13.67  | 11.65 to 15.68    | Yes | **** | <0.0001 |
| FSam:60 d vs. FSol:40 d      | 10.93  | 8.917 to 12.95    | Yes | **** | <0.0001 |
| FSam:60 d vs. FSol:60 d      | 8.633  | 6.617 to 10.65    | Yes | **** | <0.0001 |
| FSam:60 d vs. FSam+FSol:0 d  | 18.03  | 16.02 to 20.05    | Yes | **** | <0.0001 |
| FSam:60 d vs. FSam+FSol:20 d | 10     | 7.984 to 12.02    | Yes | **** | <0.0001 |
| FSam:60 d vs. FSam+FSol:40 d | 2.7    | 0.6836 to 4.716   | Yes | **   | 0.0019  |
| FSam:60 d vs. FSam+FSol:60 d | -3.7   | -5.716 to -1.684  | Yes | **** | <0.0001 |
| FSol:0 d vs. FSol:20 d       | -4.367 | -6.383 to -2.350  | Yes | **** | <0.0001 |
| FSol:0 d vs. FSol:40 d       | -7.1   | -9.116 to -5.084  | Yes | **** | <0.0001 |
| FSol:0 d vs. FSol:60 d       | -9.4   | -11.42 to -7.384  | Yes | **** | <0.0001 |
| FSol:0 d vs. FSam+FSol:0 d   | 0      | -2.016 to 2.016   | No  | ns   | >0.9999 |
| FSol:0 d vs. FSam+FSol:20 d  | -8.033 | -10.05 to -6.017  | Yes | **** | <0.0001 |
| FSol:0 d vs. FSam+FSol:40 d  | -15.33 | -17.35 to -13.32  | Yes | **** | <0.0001 |
| FSol:0 d vs. FSam+FSol:60 d  | -21.73 | -23.75 to -19.72  | Yes | **** | <0.0001 |
| FSol:20 d vs. FSol:40 d      | -2.733 | -4.750 to -0.7170 | Yes | **   | 0.0016  |
| FSol:20 d vs. FSol:60 d      | -5.033 | -7.050 to -3.017  | Yes | **** | <0.0001 |
| FSol:20 d vs. FSam+FSol:0 d  | 4.367  | 2.350 to 6.383    | Yes | **** | <0.0001 |

|                                   |         |                   |     |      |         |
|-----------------------------------|---------|-------------------|-----|------|---------|
| FSol:20 d vs. FSam+FSol:20 d      | -3.667  | -5.683 to -1.650  | Yes | **** | <0.0001 |
| FSol:20 d vs. FSam+FSol:40 d      | -10.97  | -12.98 to -8.950  | Yes | **** | <0.0001 |
| FSol:20 d vs. FSam+FSol:60 d      | -17.37  | -19.38 to -15.35  | Yes | **** | <0.0001 |
| FSol:40 d vs. FSol:60 d           | -2.3    | -4.316 to -0.2836 | Yes | *    | 0.0138  |
| FSol:40 d vs. FSam+FSol:0 d       | 7.1     | 5.084 to 9.116    | Yes | **** | <0.0001 |
| FSol:40 d vs. FSam+FSol:20 d      | -0.9333 | -2.950 to 1.083   | No  | ns   | 0.927   |
| FSol:40 d vs. FSam+FSol:40 d      | -8.233  | -10.25 to -6.217  | Yes | **** | <0.0001 |
| FSol:40 d vs. FSam+FSol:60 d      | -14.63  | -16.65 to -12.62  | Yes | **** | <0.0001 |
| FSol:60 d vs. FSam+FSol:0 d       | 9.4     | 7.384 to 11.42    | Yes | **** | <0.0001 |
| FSol:60 d vs. FSam+FSol:20 d      | 1.367   | -0.6497 to 3.383  | No  | ns   | 0.4867  |
| FSol:60 d vs. FSam+FSol:40 d      | -5.933  | -7.950 to -3.917  | Yes | **** | <0.0001 |
| FSol:60 d vs. FSam+FSol:60 d      | -12.33  | -14.35 to -10.32  | Yes | **** | <0.0001 |
| FSam+FSol:0 d vs. FSam+FSol:20 d  | -8.033  | -10.05 to -6.017  | Yes | **** | <0.0001 |
| FSam+FSol:0 d vs. FSam+FSol:40 d  | -15.33  | -17.35 to -13.32  | Yes | **** | <0.0001 |
| FSam+FSol:0 d vs. FSam+FSol:60 d  | -21.73  | -23.75 to -19.72  | Yes | **** | <0.0001 |
| FSam+FSol:20 d vs. FSam+FSol:40 d | -7.3    | -9.316 to -5.284  | Yes | **** | <0.0001 |
| FSam+FSol:20 d vs. FSam+FSol:60 d | -13.7   | -15.72 to -11.68  | Yes | **** | <0.0001 |
| FSam+FSol:40 d vs. FSam+FSol:60 d | -6.4    | -8.416 to -4.384  | Yes | **** | <0.0001 |

Table S5: Bonferroni's multiple comparisons test for rot volume of Kufri Jyoti and Kufri Frysona when infected with control (water agar), *Fusarium Sambucinum*, *Fusarium solani* and *Fusarium Sambucinum* + *Fusarium solani* and incubated for 0 d, 20 d, 40 d and 60 days

| Bonferroni's multiple comparisons test | Mean Diff. | 95.00% CI of diff. | Significant? | Summary | Adjusted P Value |
|----------------------------------------|------------|--------------------|--------------|---------|------------------|
|                                        |            |                    |              |         |                  |
| Control:0 d vs. Control:20 d           | 0          | -2592 to 2592      | No           | ns      | >0.9999          |
| Control:0 d vs. Control:40 d           | -1.819E-12 | -2592 to 2592      | No           | ns      | >0.9999          |
| Control:0 d vs. Control:60 d           | 0          | -2592 to 2592      | No           | ns      | >0.9999          |
| Control:0 d vs. FSam:0 d               | 5.457E-12  | -2592 to 2592      | No           | ns      | >0.9999          |
| Control:0 d vs. FSam:20 d              | -1120      | -3712 to 1472      | No           | ns      | >0.9999          |
| Control:0 d vs. FSam:40 d              | -7259      | -9851 to -4667     | Yes          | ****    | <0.0001          |

|                                |            |                  |     |      |         |
|--------------------------------|------------|------------------|-----|------|---------|
| Control:0 d vs. FSam:60 d      | -28200     | -30792 to -25608 | Yes | **** | <0.0001 |
| Control:0 d vs. FSol:0 d       | 0          | -2592 to 2592    | No  | ns   | >0.9999 |
| Control:0 d vs. FSol:20 d      | -581.9     | -3174 to 2010    | No  | ns   | >0.9999 |
| Control:0 d vs. FSol:40 d      | -3055      | -5647 to -463.2  | Yes | **   | 0.0035  |
| Control:0 d vs. FSol:60 d      | -8667      | -11259 to -6075  | Yes | **** | <0.0001 |
| Control:0 d vs. FSam+FSol:0 d  | 0          | -2592 to 2592    | No  | ns   | >0.9999 |
| Control:0 d vs. FSam+FSol:20 d | -2050      | -4642 to 542.4   | No  | ns   | 0.8344  |
| Control:0 d vs. FSam+FSol:40 d | -10941     | -13534 to -8349  | Yes | **** | <0.0001 |
| Control:0 d vs. FSam+FSol:60 d | -38056     | -40648 to -35464 | Yes | **** | <0.0001 |
| Control:0 d vs. Control:0 d    | 0          | -2592 to 2592    | No  | ns   | >0.9999 |
| Control:0 d vs. Control:20 d   | 3.638E-12  | -2592 to 2592    | No  | ns   | >0.9999 |
| Control:0 d vs. Control:40 d   | -1.819E-12 | -2592 to 2592    | No  | ns   | >0.9999 |
| Control:0 d vs. Control:60 d   | 0          | -2592 to 2592    | No  | ns   | >0.9999 |
| Control:0 d vs. FSam:0 d       | 2.728E-12  | -2592 to 2592    | No  | ns   | >0.9999 |
| Control:0 d vs. FSam:20 d      | -719.2     | -3311 to 1873    | No  | ns   | >0.9999 |
| Control:0 d vs. FSam:40 d      | -3745      | -6337 to -1153   | Yes | **** | <0.0001 |
| Control:0 d vs. FSam:60 d      | -8763      | -11355 to -6171  | Yes | **** | <0.0001 |
| Control:0 d vs. FSol:0 d       | -2.728E-12 | -2592 to 2592    | No  | ns   | >0.9999 |
| Control:0 d vs. FSol:20 d      | -359.3     | -2951 to 2233    | No  | ns   | >0.9999 |
| Control:0 d vs. FSol:40 d      | -1488      | -4080 to 1104    | No  | ns   | >0.9999 |
| Control:0 d vs. FSol:60 d      | -4608      | -7200 to -2016   | Yes | **** | <0.0001 |
| Control:0 d vs. FSam+FSol:0 d  | 0          | -2592 to 2592    | No  | ns   | >0.9999 |
| Control:0 d vs. FSam+FSol:20 d | -1061      | -3653 to 1531    | No  | ns   | >0.9999 |
| Control:0 d vs. FSam+FSol:40 d | -5606      | -8198 to -3014   | Yes | **** | <0.0001 |
| Control:0 d vs. FSam+FSol:60 d | -19013     | -21605 to -16421 | Yes | **** | <0.0001 |
| Control:20 d vs. Control:40 d  | -1.819E-12 | -2592 to 2592    | No  | ns   | >0.9999 |
| Control:20 d vs. Control:60 d  | 0          | -2592 to 2592    | No  | ns   | >0.9999 |
| Control:20 d vs. FSam:0 d      | 5.457E-12  | -2592 to 2592    | No  | ns   | >0.9999 |
| Control:20 d vs. FSam:20 d     | -1120      | -3712 to 1472    | No  | ns   | >0.9999 |
| Control:20 d vs. FSam:40 d     | -7259      | -9851 to -4667   | Yes | **** | <0.0001 |

|                                 |            |                  |     |      |         |
|---------------------------------|------------|------------------|-----|------|---------|
| Control:20 d vs. FSam:60 d      | -28200     | -30792 to -25608 | Yes | **** | <0.0001 |
| Control:20 d vs. FSol:0 d       | 0          | -2592 to 2592    | No  | ns   | >0.9999 |
| Control:20 d vs. FSol:20 d      | -581.9     | -3174 to 2010    | No  | ns   | >0.9999 |
| Control:20 d vs. FSol:40 d      | -3055      | -5647 to -463.2  | Yes | **   | 0.0035  |
| Control:20 d vs. FSol:60 d      | -8667      | -11259 to -6075  | Yes | **** | <0.0001 |
| Control:20 d vs. FSam+FSol:0 d  | 0          | -2592 to 2592    | No  | ns   | >0.9999 |
| Control:20 d vs. FSam+FSol:20 d | -2050      | -4642 to 542.4   | No  | ns   | 0.8344  |
| Control:20 d vs. FSam+FSol:40 d | -10941     | -13534 to -8349  | Yes | **** | <0.0001 |
| Control:20 d vs. FSam+FSol:60 d | -38056     | -40648 to -35464 | Yes | **** | <0.0001 |
| Control:20 d vs. Control:0 d    | 0          | -2592 to 2592    | No  | ns   | >0.9999 |
| Control:20 d vs. Control:20 d   | 3.638E-12  | -2592 to 2592    | No  | ns   | >0.9999 |
| Control:20 d vs. Control:40 d   | -1.819E-12 | -2592 to 2592    | No  | ns   | >0.9999 |
| Control:20 d vs. Control:60 d   | 0          | -2592 to 2592    | No  | ns   | >0.9999 |
| Control:20 d vs. FSam:0 d       | 2.728E-12  | -2592 to 2592    | No  | ns   | >0.9999 |
| Control:20 d vs. FSam:20 d      | -719.2     | -3311 to 1873    | No  | ns   | >0.9999 |
| Control:20 d vs. FSam:40 d      | -3745      | -6337 to -1153   | Yes | **** | <0.0001 |
| Control:20 d vs. FSam:60 d      | -8763      | -11355 to -6171  | Yes | **** | <0.0001 |
| Control:20 d vs. FSol:0 d       | -2.728E-12 | -2592 to 2592    | No  | ns   | >0.9999 |
| Control:20 d vs. FSol:20 d      | -359.3     | -2951 to 2233    | No  | ns   | >0.9999 |
| Control:20 d vs. FSol:40 d      | -1488      | -4080 to 1104    | No  | ns   | >0.9999 |
| Control:20 d vs. FSol:60 d      | -4608      | -7200 to -2016   | Yes | **** | <0.0001 |
| Control:20 d vs. FSam+FSol:0 d  | 0          | -2592 to 2592    | No  | ns   | >0.9999 |
| Control:20 d vs. FSam+FSol:20 d | -1061      | -3653 to 1531    | No  | ns   | >0.9999 |
| Control:20 d vs. FSam+FSol:40 d | -5606      | -8198 to -3014   | Yes | **** | <0.0001 |
| Control:20 d vs. FSam+FSol:60 d | -19013     | -21605 to -16421 | Yes | **** | <0.0001 |
| Control:40 d vs. Control:60 d   | 1.819E-12  | -2592 to 2592    | No  | ns   | >0.9999 |
| Control:40 d vs. FSam:0 d       | 7.276E-12  | -2592 to 2592    | No  | ns   | >0.9999 |
| Control:40 d vs. FSam:20 d      | -1120      | -3712 to 1472    | No  | ns   | >0.9999 |
| Control:40 d vs. FSam:40 d      | -7259      | -9851 to -4667   | Yes | **** | <0.0001 |
| Control:40 d vs. FSam:60 d      | -28200     | -30792 to -25608 | Yes | **** | <0.0001 |

|                                 |            |                  |     |      |         |
|---------------------------------|------------|------------------|-----|------|---------|
| Control:40 d vs. FSol:0 d       | 1.819E-12  | -2592 to 2592    | No  | ns   | >0.9999 |
| Control:40 d vs. FSol:20 d      | -581.9     | -3174 to 2010    | No  | ns   | >0.9999 |
| Control:40 d vs. FSol:40 d      | -3055      | -5647 to -463.2  | Yes | **   | 0.0035  |
| Control:40 d vs. FSol:60 d      | -8667      | -11259 to -6075  | Yes | **** | <0.0001 |
| Control:40 d vs. FSam+FSol:0 d  | 1.819E-12  | -2592 to 2592    | No  | ns   | >0.9999 |
| Control:40 d vs. FSam+FSol:20 d | -2050      | -4642 to 542.4   | No  | ns   | 0.8344  |
| Control:40 d vs. FSam+FSol:40 d | -10941     | -13534 to -8349  | Yes | **** | <0.0001 |
| Control:40 d vs. FSam+FSol:60 d | -38056     | -40648 to -35464 | Yes | **** | <0.0001 |
| Control:40 d vs. Control:0 d    | 1.819E-12  | -2592 to 2592    | No  | ns   | >0.9999 |
| Control:40 d vs. Control:20 d   | 5.457E-12  | -2592 to 2592    | No  | ns   | >0.9999 |
| Control:40 d vs. Control:40 d   | 0          | -2592 to 2592    | No  | ns   | >0.9999 |
| Control:40 d vs. Control:60 d   | 1.819E-12  | -2592 to 2592    | No  | ns   | >0.9999 |
| Control:40 d vs. FSam:0 d       | 4.547E-12  | -2592 to 2592    | No  | ns   | >0.9999 |
| Control:40 d vs. FSam:20 d      | -719.2     | -3311 to 1873    | No  | ns   | >0.9999 |
| Control:40 d vs. FSam:40 d      | -3745      | -6337 to -1153   | Yes | **** | <0.0001 |
| Control:40 d vs. FSam:60 d      | -8763      | -11355 to -6171  | Yes | **** | <0.0001 |
| Control:40 d vs. FSol:0 d       | -9.095E-13 | -2592 to 2592    | No  | ns   | >0.9999 |
| Control:40 d vs. FSol:20 d      | -359.3     | -2951 to 2233    | No  | ns   | >0.9999 |
| Control:40 d vs. FSol:40 d      | -1488      | -4080 to 1104    | No  | ns   | >0.9999 |
| Control:40 d vs. FSol:60 d      | -4608      | -7200 to -2016   | Yes | **** | <0.0001 |
| Control:40 d vs. FSam+FSol:0 d  | 1.819E-12  | -2592 to 2592    | No  | ns   | >0.9999 |
| Control:40 d vs. FSam+FSol:20 d | -1061      | -3653 to 1531    | No  | ns   | >0.9999 |
| Control:40 d vs. FSam+FSol:40 d | -5606      | -8198 to -3014   | Yes | **** | <0.0001 |
| Control:40 d vs. FSam+FSol:60 d | -19013     | -21605 to -16421 | Yes | **** | <0.0001 |
| Control:60 d vs. FSam:0 d       | 5.457E-12  | -2592 to 2592    | No  | ns   | >0.9999 |
| Control:60 d vs. FSam:20 d      | -1120      | -3712 to 1472    | No  | ns   | >0.9999 |
| Control:60 d vs. FSam:40 d      | -7259      | -9851 to -4667   | Yes | **** | <0.0001 |
| Control:60 d vs. FSam:60 d      | -28200     | -30792 to -25608 | Yes | **** | <0.0001 |
| Control:60 d vs. FSol:0 d       | 0          | -2592 to 2592    | No  | ns   | >0.9999 |
| Control:60 d vs. FSol:20 d      | -581.9     | -3174 to 2010    | No  | ns   | >0.9999 |

|                                 |            |                  |     |      |         |
|---------------------------------|------------|------------------|-----|------|---------|
| Control:60 d vs. FSol:40 d      | -3055      | -5647 to -463.2  | Yes | **   | 0.0035  |
| Control:60 d vs. FSol:60 d      | -8667      | -11259 to -6075  | Yes | **** | <0.0001 |
| Control:60 d vs. FSam+FSol:0 d  | 0          | -2592 to 2592    | No  | ns   | >0.9999 |
| Control:60 d vs. FSam+FSol:20 d | -2050      | -4642 to 542.4   | No  | ns   | 0.8344  |
| Control:60 d vs. FSam+FSol:40 d | -10941     | -13534 to -8349  | Yes | **** | <0.0001 |
| Control:60 d vs. FSam+FSol:60 d | -38056     | -40648 to -35464 | Yes | **** | <0.0001 |
| Control:60 d vs. Control:0 d    | 0          | -2592 to 2592    | No  | ns   | >0.9999 |
| Control:60 d vs. Control:20 d   | 3.638E-12  | -2592 to 2592    | No  | ns   | >0.9999 |
| Control:60 d vs. Control:40 d   | -1.819E-12 | -2592 to 2592    | No  | ns   | >0.9999 |
| Control:60 d vs. Control:60 d   | 0          | -2592 to 2592    | No  | ns   | >0.9999 |
| Control:60 d vs. FSam:0 d       | 2.728E-12  | -2592 to 2592    | No  | ns   | >0.9999 |
| Control:60 d vs. FSam:20 d      | -719.2     | -3311 to 1873    | No  | ns   | >0.9999 |
| Control:60 d vs. FSam:40 d      | -3745      | -6337 to -1153   | Yes | **** | <0.0001 |
| Control:60 d vs. FSam:60 d      | -8763      | -11355 to -6171  | Yes | **** | <0.0001 |
| Control:60 d vs. FSol:0 d       | -2.728E-12 | -2592 to 2592    | No  | ns   | >0.9999 |
| Control:60 d vs. FSol:20 d      | -359.3     | -2951 to 2233    | No  | ns   | >0.9999 |
| Control:60 d vs. FSol:40 d      | -1488      | -4080 to 1104    | No  | ns   | >0.9999 |
| Control:60 d vs. FSol:60 d      | -4608      | -7200 to -2016   | Yes | **** | <0.0001 |
| Control:60 d vs. FSam+FSol:0 d  | 0          | -2592 to 2592    | No  | ns   | >0.9999 |
| Control:60 d vs. FSam+FSol:20 d | -1061      | -3653 to 1531    | No  | ns   | >0.9999 |
| Control:60 d vs. FSam+FSol:40 d | -5606      | -8198 to -3014   | Yes | **** | <0.0001 |
| Control:60 d vs. FSam+FSol:60 d | -19013     | -21605 to -16421 | Yes | **** | <0.0001 |
| FSam:0 d vs. FSam:20 d          | -1120      | -3712 to 1472    | No  | ns   | >0.9999 |
| FSam:0 d vs. FSam:40 d          | -7259      | -9851 to -4667   | Yes | **** | <0.0001 |
| FSam:0 d vs. FSam:60 d          | -28200     | -30792 to -25608 | Yes | **** | <0.0001 |
| FSam:0 d vs. FSol:0 d           | -5.457E-12 | -2592 to 2592    | No  | ns   | >0.9999 |
| FSam:0 d vs. FSol:20 d          | -581.9     | -3174 to 2010    | No  | ns   | >0.9999 |
| FSam:0 d vs. FSol:40 d          | -3055      | -5647 to -463.2  | Yes | **   | 0.0035  |
| FSam:0 d vs. FSol:60 d          | -8667      | -11259 to -6075  | Yes | **** | <0.0001 |

|                             |            |                  |     |      |         |
|-----------------------------|------------|------------------|-----|------|---------|
| FSam:0 d vs. FSam+FSol:0 d  | -5.457E-12 | -2592 to 2592    | No  | ns   | >0.9999 |
| FSam:0 d vs. FSam+FSol:20 d | -2050      | -4642 to 542.4   | No  | ns   | 0.8344  |
| FSam:0 d vs. FSam+FSol:40 d | -10941     | -13534 to -8349  | Yes | **** | <0.0001 |
| FSam:0 d vs. FSam+FSol:60 d | -38056     | -40648 to -35464 | Yes | **** | <0.0001 |
| FSam:0 d vs. Control:0 d    | -5.457E-12 | -2592 to 2592    | No  | ns   | >0.9999 |
| FSam:0 d vs. Control:20 d   | -1.819E-12 | -2592 to 2592    | No  | ns   | >0.9999 |
| FSam:0 d vs. Control:40 d   | -7.276E-12 | -2592 to 2592    | No  | ns   | >0.9999 |
| FSam:0 d vs. Control:60 d   | -5.457E-12 | -2592 to 2592    | No  | ns   | >0.9999 |
| FSam:0 d vs. FSam:0 d       | -2.728E-12 | -2592 to 2592    | No  | ns   | >0.9999 |
| FSam:0 d vs. FSam:20 d      | -719.2     | -3311 to 1873    | No  | ns   | >0.9999 |
| FSam:0 d vs. FSam:40 d      | -3745      | -6337 to -1153   | Yes | **** | <0.0001 |
| FSam:0 d vs. FSam:60 d      | -8763      | -11355 to -6171  | Yes | **** | <0.0001 |
| FSam:0 d vs. FSol:0 d       | -8.185E-12 | -2592 to 2592    | No  | ns   | >0.9999 |
| FSam:0 d vs. FSol:20 d      | -359.3     | -2951 to 2233    | No  | ns   | >0.9999 |
| FSam:0 d vs. FSol:40 d      | -1488      | -4080 to 1104    | No  | ns   | >0.9999 |
| FSam:0 d vs. FSol:60 d      | -4608      | -7200 to -2016   | Yes | **** | <0.0001 |
| FSam:0 d vs. FSam+FSol:0 d  | -5.457E-12 | -2592 to 2592    | No  | ns   | >0.9999 |
| FSam:0 d vs. FSam+FSol:20 d | -1061      | -3653 to 1531    | No  | ns   | >0.9999 |
| FSam:0 d vs. FSam+FSol:40 d | -5606      | -8198 to -3014   | Yes | **** | <0.0001 |
| FSam:0 d vs. FSam+FSol:60 d | -19013     | -21605 to -16421 | Yes | **** | <0.0001 |
| FSam:20 d vs. FSam:40 d     | -6139      | -8731 to -3547   | Yes | **** | <0.0001 |
| FSam:20 d vs. FSam:60 d     | -27080     | -29672 to -24488 | Yes | **** | <0.0001 |
| FSam:20 d vs. FSol:0 d      | 1120       | -1472 to 3712    | No  | ns   | >0.9999 |
| FSam:20 d vs. FSol:20 d     | 538.2      | -2054 to 3130    | No  | ns   | >0.9999 |
| FSam:20 d vs. FSol:40 d     | -1935      | -4527 to 657.0   | No  | ns   | >0.9999 |

|                              |        |                  |     |      |         |
|------------------------------|--------|------------------|-----|------|---------|
| FSam:20 d vs. FSol:60 d      | -7547  | -10139 to -4955  | Yes | **** | <0.0001 |
| FSam:20 d vs. FSam+FSol:0 d  | 1120   | -1472 to 3712    | No  | ns   | >0.9999 |
| FSam:20 d vs. FSam+FSol:20 d | -929.5 | -3522 to 1663    | No  | ns   | >0.9999 |
| FSam:20 d vs. FSam+FSol:40 d | -9821  | -12413 to -7229  | Yes | **** | <0.0001 |
| FSam:20 d vs. FSam+FSol:60 d | -36936 | -39528 to -34344 | Yes | **** | <0.0001 |
| FSam:20 d vs. Control:0 d    | 1120   | -1472 to 3712    | No  | ns   | >0.9999 |
| FSam:20 d vs. Control:20 d   | 1120   | -1472 to 3712    | No  | ns   | >0.9999 |
| FSam:20 d vs. Control:40 d   | 1120   | -1472 to 3712    | No  | ns   | >0.9999 |
| FSam:20 d vs. Control:60 d   | 1120   | -1472 to 3712    | No  | ns   | >0.9999 |
| FSam:20 d vs. FSam:0 d       | 1120   | -1472 to 3712    | No  | ns   | >0.9999 |
| FSam:20 d vs. FSam:20 d      | 400.9  | -2191 to 2993    | No  | ns   | >0.9999 |
| FSam:20 d vs. FSam:40 d      | -2625  | -5217 to -32.89  | Yes | *    | 0.0417  |
| FSam:20 d vs. FSam:60 d      | -7643  | -10235 to -5051  | Yes | **** | <0.0001 |
| FSam:20 d vs. FSol:0 d       | 1120   | -1472 to 3712    | No  | ns   | >0.9999 |
| FSam:20 d vs. FSol:20 d      | 760.9  | -1831 to 3353    | No  | ns   | >0.9999 |
| FSam:20 d vs. FSol:40 d      | -368   | -2960 to 2224    | No  | ns   | >0.9999 |
| FSam:20 d vs. FSol:60 d      | -3488  | -6080 to -896.2  | Yes | ***  | 0.0003  |
| FSam:20 d vs. FSam+FSol:0 d  | 1120   | -1472 to 3712    | No  | ns   | >0.9999 |
| FSam:20 d vs. FSam+FSol:20 d | 59.47  | -2533 to 2652    | No  | ns   | >0.9999 |
| FSam:20 d vs. FSam+FSol:40 d | -4486  | -7078 to -1894   | Yes | **** | <0.0001 |
| FSam:20 d vs. FSam+FSol:60 d | -17893 | -20485 to -15301 | Yes | **** | <0.0001 |
| FSam:40 d vs. FSam:60 d      | -20942 | -23534 to -18350 | Yes | **** | <0.0001 |
| FSam:40 d vs. FSol:0 d       | 7259   | 4667 to 9851     | Yes | **** | <0.0001 |
| FSam:40 d vs. FSol:20 d      | 6677   | 4085 to 9269     | Yes | **** | <0.0001 |
| FSam:40 d vs. FSol:40 d      | 4204   | 1612 to 6796     | Yes | **** | <0.0001 |
| FSam:40 d vs. FSol:60 d      | -1408  | -4000 to 1184    | No  | ns   | >0.9999 |
| FSam:40 d vs. FSam+FSol:0 d  | 7259   | 4667 to 9851     | Yes | **** | <0.0001 |
| FSam:40 d vs. FSam+FSol:20 d | 5209   | 2617 to 7801     | Yes | **** | <0.0001 |
| FSam:40 d vs. FSam+FSol:40 d | -3683  | -6275 to -1091   | Yes | **** | <0.0001 |
| FSam:40 d vs. FSam+FSol:60 d | -30798 | -33390 to -28205 | Yes | **** | <0.0001 |
| FSam:40 d vs. Control:0 d    | 7259   | 4667 to 9851     | Yes | **** | <0.0001 |
| FSam:40 d vs. Control:20 d   | 7259   | 4667 to 9851     | Yes | **** | <0.0001 |
| FSam:40 d vs. Control:40 d   | 7259   | 4667 to 9851     | Yes | **** | <0.0001 |
| FSam:40 d vs. Control:60 d   | 7259   | 4667 to 9851     | Yes | **** | <0.0001 |
| FSam:40 d vs. FSam:0 d       | 7259   | 4667 to 9851     | Yes | **** | <0.0001 |
| FSam:40 d vs. FSam:20 d      | 6540   | 3948 to 9132     | Yes | **** | <0.0001 |
| FSam:40 d vs. FSam:40 d      | 3514   | 921.7 to 6106    | Yes | ***  | 0.0002  |
| FSam:40 d vs. FSam:60 d      | -1505  | -4097 to 1088    | No  | ns   | >0.9999 |



|                              |        |                 |     |      |         |
|------------------------------|--------|-----------------|-----|------|---------|
| FSam:40 d vs. FSol:0 d       | 7259   | 4667 to 9851    | Yes | **** | <0.0001 |
| FSam:40 d vs. FSol:20 d      | 6900   | 4308 to 9492    | Yes | **** | <0.0001 |
| FSam:40 d vs. FSol:40 d      | 5771   | 3179 to 8363    | Yes | **** | <0.0001 |
| FSam:40 d vs. FSol:60 d      | 2650   | 58.34 to 5242   | Yes | *    | 0.0362  |
| FSam:40 d vs. FSam+FSol:0 d  | 7259   | 4667 to 9851    | Yes | **** | <0.0001 |
| FSam:40 d vs. FSam+FSol:20 d | 6198   | 3606 to 8790    | Yes | **** | <0.0001 |
| FSam:40 d vs. FSam+FSol:40 d | 1653   | -939.0 to 4245  | No  | ns   | >0.9999 |
| FSam:40 d vs. FSam+FSol:60 d | -11754 | -14346 to -9162 | Yes | **** | <0.0001 |
| FSam:60 d vs. FSol:0 d       | 28200  | 25608 to 30792  | Yes | **** | <0.0001 |
| FSam:60 d vs. FSol:20 d      | 27618  | 25026 to 30210  | Yes | **** | <0.0001 |
| FSam:60 d vs. FSol:40 d      | 25145  | 22553 to 27737  | Yes | **** | <0.0001 |
| FSam:60 d vs. FSol:60 d      | 19534  | 16942 to 22126  | Yes | **** | <0.0001 |
| FSam:60 d vs. FSam+FSol:0 d  | 28200  | 25608 to 30792  | Yes | **** | <0.0001 |
| FSam:60 d vs. FSam+FSol:20 d | 26151  | 23559 to 28743  | Yes | **** | <0.0001 |
| FSam:60 d vs. FSam+FSol:40 d | 17259  | 14667 to 19851  | Yes | **** | <0.0001 |
| FSam:60 d vs. FSam+FSol:60 d | -9856  | -12448 to -7264 | Yes | **** | <0.0001 |
| FSam:60 d vs. Control:0 d    | 28200  | 25608 to 30792  | Yes | **** | <0.0001 |
| FSam:60 d vs. Control:20 d   | 28200  | 25608 to 30792  | Yes | **** | <0.0001 |
| FSam:60 d vs. Control:40 d   | 28200  | 25608 to 30792  | Yes | **** | <0.0001 |
| FSam:60 d vs. Control:60 d   | 28200  | 25608 to 30792  | Yes | **** | <0.0001 |
| FSam:60 d vs. FSam:0 d       | 28200  | 25608 to 30792  | Yes | **** | <0.0001 |
| FSam:60 d vs. FSam:20 d      | 27481  | 24889 to 30073  | Yes | **** | <0.0001 |
| FSam:60 d vs. FSam:40 d      | 24455  | 21863 to 27047  | Yes | **** | <0.0001 |
| FSam:60 d vs. FSam:60 d      | 19437  | 16845 to 22029  | Yes | **** | <0.0001 |
| FSam:60 d vs. FSol:0 d       | 28200  | 25608 to 30792  | Yes | **** | <0.0001 |
| FSam:60 d vs. FSol:20 d      | 27841  | 25249 to 30433  | Yes | **** | <0.0001 |
| FSam:60 d vs. FSol:40 d      | 26712  | 24120 to 29304  | Yes | **** | <0.0001 |
| FSam:60 d vs. FSol:60 d      | 23592  | 21000 to 26184  | Yes | **** | <0.0001 |
| FSam:60 d vs. FSam+FSol:0 d  | 28200  | 25608 to 30792  | Yes | **** | <0.0001 |

|                              |            |                  |     |      |         |
|------------------------------|------------|------------------|-----|------|---------|
| FSam:60 d vs. FSam+FSol:20 d | 27140      | 24548 to 29732   | Yes | **** | <0.0001 |
| FSam:60 d vs. FSam+FSol:40 d | 22595      | 20003 to 25187   | Yes | **** | <0.0001 |
| FSam:60 d vs. FSam+FSol:60 d | 9187       | 6595 to 11779    | Yes | **** | <0.0001 |
| FSol:0 d vs. FSol:20 d       | -581.9     | -3174 to 2010    | No  | ns   | >0.9999 |
| FSol:0 d vs. FSol:40 d       | -3055      | -5647 to -463.2  | Yes | **   | 0.0035  |
| FSol:0 d vs. FSol:60 d       | -8667      | -11259 to -6075  | Yes | **** | <0.0001 |
| FSol:0 d vs. FSam+FSol:0 d   | 0          | -2592 to 2592    | No  | ns   | >0.9999 |
| FSol:0 d vs. FSam+FSol:20 d  | -2050      | -4642 to 542.4   | No  | ns   | 0.8344  |
| FSol:0 d vs. FSam+FSol:40 d  | -10941     | -13534 to -8349  | Yes | **** | <0.0001 |
| FSol:0 d vs. FSam+FSol:60 d  | -38056     | -40648 to -35464 | Yes | **** | <0.0001 |
| FSol:0 d vs. Control:0 d     | 0          | -2592 to 2592    | No  | ns   | >0.9999 |
| FSol:0 d vs. Control:20 d    | 3.638E-12  | -2592 to 2592    | No  | ns   | >0.9999 |
| FSol:0 d vs. Control:40 d    | -1.819E-12 | -2592 to 2592    | No  | ns   | >0.9999 |
| FSol:0 d vs. Control:60 d    | 0          | -2592 to 2592    | No  | ns   | >0.9999 |
| FSol:0 d vs. FSam:0 d        | 2.728E-12  | -2592 to 2592    | No  | ns   | >0.9999 |
| FSol:0 d vs. FSam:20 d       | -719.2     | -3311 to 1873    | No  | ns   | >0.9999 |
| FSol:0 d vs. FSam:40 d       | -3745      | -6337 to -1153   | Yes | **** | <0.0001 |
| FSol:0 d vs. FSam:60 d       | -8763      | -11355 to -6171  | Yes | **** | <0.0001 |
| FSol:0 d vs. FSol:0 d        | -2.728E-12 | -2592 to 2592    | No  | ns   | >0.9999 |
| FSol:0 d vs. FSol:20 d       | -359.3     | -2951 to 2233    | No  | ns   | >0.9999 |
| FSol:0 d vs. FSol:40 d       | -1488      | -4080 to 1104    | No  | ns   | >0.9999 |
| FSol:0 d vs. FSol:60 d       | -4608      | -7200 to -2016   | Yes | **** | <0.0001 |
| FSol:0 d vs. FSam+FSol:0 d   | 0          | -2592 to 2592    | No  | ns   | >0.9999 |
| FSol:0 d vs. FSam+FSol:20 d  | -1061      | -3653 to 1531    | No  | ns   | >0.9999 |
| FSol:0 d vs. FSam+FSol:40 d  | -5606      | -8198 to -3014   | Yes | **** | <0.0001 |
| FSol:0 d vs. FSam+FSol:60 d  | -19013     | -21605 to -16421 | Yes | **** | <0.0001 |
| FSol:20 d vs. FSol:40 d      | -2473      | -5065 to 118.7   | No  | ns   | 0.0954  |
| FSol:20 d vs. FSol:60 d      | -8085      | -10677 to -5493  | Yes | **** | <0.0001 |
| FSol:20 d vs. FSam+FSol:0 d  | 581.9      | -2010 to 3174    | No  | ns   | >0.9999 |
| FSol:20 d vs. FSam+FSol:20 d | -1468      | -4060 to 1124    | No  | ns   | >0.9999 |
| FSol:20 d vs. FSam+FSol:40 d | -10360     | -12952 to -7767  | Yes | **** | <0.0001 |

|                              |        |                  |     |      |         |
|------------------------------|--------|------------------|-----|------|---------|
| FSol:20 d vs. FSam+FSol:60 d | -37474 | -40066 to -34882 | Yes | **** | <0.0001 |
| FSol:20 d vs. Control:0 d    | 581.9  | -2010 to 3174    | No  | ns   | >0.9999 |
| FSol:20 d vs. Control:20 d   | 581.9  | -2010 to 3174    | No  | ns   | >0.9999 |
| FSol:20 d vs. Control:40 d   | 581.9  | -2010 to 3174    | No  | ns   | >0.9999 |
| FSol:20 d vs. Control:60 d   | 581.9  | -2010 to 3174    | No  | ns   | >0.9999 |
| FSol:20 d vs. FSam:0 d       | 581.9  | -2010 to 3174    | No  | ns   | >0.9999 |
| FSol:20 d vs. FSam:20 d      | -137.3 | -2729 to 2455    | No  | ns   | >0.9999 |
| FSol:20 d vs. FSam:40 d      | -3163  | -5755 to -571.1  | Yes | **   | 0.0019  |
| FSol:20 d vs. FSam:60 d      | -8181  | -10773 to -5589  | Yes | **** | <0.0001 |
| FSol:20 d vs. FSol:0 d       | 581.9  | -2010 to 3174    | No  | ns   | >0.9999 |
| FSol:20 d vs. FSol:20 d      | 222.7  | -2369 to 2815    | No  | ns   | >0.9999 |
| FSol:20 d vs. FSol:40 d      | -906.2 | -3498 to 1686    | No  | ns   | >0.9999 |
| FSol:20 d vs. FSol:60 d      | -4026  | -6619 to -1434   | Yes | **** | <0.0001 |
| FSol:20 d vs. FSam+FSol:0 d  | 581.9  | -2010 to 3174    | No  | ns   | >0.9999 |
| FSol:20 d vs. FSam+FSol:20 d | -478.8 | -3071 to 2113    | No  | ns   | >0.9999 |
| FSol:20 d vs. FSam+FSol:40 d | -5024  | -7616 to -2432   | Yes | **** | <0.0001 |
| FSol:20 d vs. FSam+FSol:60 d | -18431 | -21023 to -15839 | Yes | **** | <0.0001 |
| FSol:40 d vs. FSol:60 d      | -5612  | -8204 to -3020   | Yes | **** | <0.0001 |
| FSol:40 d vs. FSam+FSol:0 d  | 3055   | 463.2 to 5647    | Yes | **   | 0.0035  |
| FSol:40 d vs. FSam+FSol:20 d | 1006   | -1586 to 3598    | No  | ns   | >0.9999 |
| FSol:40 d vs. FSam+FSol:40 d | -7886  | -10478 to -5294  | Yes | **** | <0.0001 |
| FSol:40 d vs. FSam+FSol:60 d | -35001 | -37593 to -32409 | Yes | **** | <0.0001 |
| FSol:40 d vs. Control:0 d    | 3055   | 463.2 to 5647    | Yes | **   | 0.0035  |
| FSol:40 d vs. Control:20 d   | 3055   | 463.2 to 5647    | Yes | **   | 0.0035  |
| FSol:40 d vs. Control:40 d   | 3055   | 463.2 to 5647    | Yes | **   | 0.0035  |
| FSol:40 d vs. Control:60 d   | 3055   | 463.2 to 5647    | Yes | **   | 0.0035  |
| FSol:40 d vs. FSam:0 d       | 3055   | 463.2 to 5647    | Yes | **   | 0.0035  |
| FSol:40 d vs. FSam:20 d      | 2336   | -256.1 to 4928   | No  | ns   | 0.1973  |
| FSol:40 d vs. FSam:40 d      | -689.9 | -3282 to 1902    | No  | ns   | >0.9999 |
| FSol:40 d vs. FSam:60 d      | -5708  | -8300 to -3116   | Yes | **** | <0.0001 |
| FSol:40 d vs. FSol:0 d       | 3055   | 463.2 to 5647    | Yes | **   | 0.0035  |
| FSol:40 d vs. FSol:20 d      | 2696   | 103.9 to 5288    | Yes | *    | 0.0281  |
| FSol:40 d vs. FSol:40 d      | 1567   | -1025 to 4159    | No  | ns   | >0.9999 |
| FSol:40 d vs. FSol:60 d      | -1553  | -4145 to 1039    | No  | ns   | >0.9999 |
| FSol:40 d vs. FSam+FSol:0 d  | 3055   | 463.2 to 5647    | Yes | **   | 0.0035  |
| FSol:40 d vs. FSam+FSol:20 d | 1995   | -597.5 to 4587   | No  | ns   | >0.9999 |

|                                  |            |                  |     |      |         |
|----------------------------------|------------|------------------|-----|------|---------|
| FSol:40 d vs. FSam+FSol:40 d     | -2551      | -5143 to 41.53   | No  | ns   | 0.0628  |
| FSol:40 d vs. FSam+FSol:60 d     | -15958     | -18550 to -13366 | Yes | **** | <0.0001 |
| FSol:60 d vs. FSam+FSol:0 d      | 8667       | 6075 to 11259    | Yes | **** | <0.0001 |
| FSol:60 d vs. FSam+FSol:20 d     | 6617       | 4025 to 9209     | Yes | **** | <0.0001 |
| FSol:60 d vs. FSam+FSol:40 d     | -2275      | -4867 to 317.4   | No  | ns   | 0.2711  |
| FSol:60 d vs. FSam+FSol:60 d     | -29390     | -31982 to -26798 | Yes | **** | <0.0001 |
| FSol:60 d vs. Control:0 d        | 8667       | 6075 to 11259    | Yes | **** | <0.0001 |
| FSol:60 d vs. Control:20 d       | 8667       | 6075 to 11259    | Yes | **** | <0.0001 |
| FSol:60 d vs. Control:40 d       | 8667       | 6075 to 11259    | Yes | **** | <0.0001 |
| FSol:60 d vs. Control:60 d       | 8667       | 6075 to 11259    | Yes | **** | <0.0001 |
| FSol:60 d vs. FSam:0 d           | 8667       | 6075 to 11259    | Yes | **** | <0.0001 |
| FSol:60 d vs. FSam:20 d          | 7948       | 5356 to 10540    | Yes | **** | <0.0001 |
| FSol:60 d vs. FSam:40 d          | 4922       | 2330 to 7514     | Yes | **** | <0.0001 |
| FSol:60 d vs. FSam:60 d          | -96.56     | -2689 to 2495    | No  | ns   | >0.9999 |
| FSol:60 d vs. FSol:0 d           | 8667       | 6075 to 11259    | Yes | **** | <0.0001 |
| FSol:60 d vs. FSol:20 d          | 8308       | 5716 to 10900    | Yes | **** | <0.0001 |
| FSol:60 d vs. FSol:40 d          | 7179       | 4587 to 9771     | Yes | **** | <0.0001 |
| FSol:60 d vs. FSol:60 d          | 4058       | 1466 to 6650     | Yes | **** | <0.0001 |
| FSol:60 d vs. FSam+FSol:0 d      | 8667       | 6075 to 11259    | Yes | **** | <0.0001 |
| FSol:60 d vs. FSam+FSol:20 d     | 7606       | 5014 to 10198    | Yes | **** | <0.0001 |
| FSol:60 d vs. FSam+FSol:40 d     | 3061       | 469.0 to 5653    | Yes | **   | 0.0034  |
| FSol:60 d vs. FSam+FSol:60 d     | -10346     | -12938 to -7754  | Yes | **** | <0.0001 |
| FSam+FSol:0 d vs. FSam+FSol:20 d | -2050      | -4642 to 542.4   | No  | ns   | 0.8344  |
| FSam+FSol:0 d vs. FSam+FSol:40 d | -10941     | -13534 to -8349  | Yes | **** | <0.0001 |
| FSam+FSol:0 d vs. FSam+FSol:60 d | -38056     | -40648 to -35464 | Yes | **** | <0.0001 |
| FSam+FSol:0 d vs. Control:0 d    | 0          | -2592 to 2592    | No  | ns   | >0.9999 |
| FSam+FSol:0 d vs. Control:20 d   | 3.638E-12  | -2592 to 2592    | No  | ns   | >0.9999 |
| FSam+FSol:0 d vs. Control:40 d   | -1.819E-12 | -2592 to 2592    | No  | ns   | >0.9999 |
| FSam+FSol:0 d vs. Control:60 d   | 0          | -2592 to 2592    | No  | ns   | >0.9999 |
| FSam+FSol:0 d vs. FSam:0 d       | 2.728E-12  | -2592 to 2592    | No  | ns   | >0.9999 |
| FSam+FSol:0 d vs. FSam:20 d      | -719.2     | -3311 to 1873    | No  | ns   | >0.9999 |
| FSam+FSol:0 d vs. FSam:40 d      | -3745      | -6337 to -1153   | Yes | **** | <0.0001 |
| FSam+FSol:0 d vs. FSam:60 d      | -8763      | -11355 to -6171  | Yes | **** | <0.0001 |
| FSam+FSol:0 d vs. FSol:0 d       | -2.728E-12 | -2592 to 2592    | No  | ns   | >0.9999 |

|                                   |        |                  |     |      |         |
|-----------------------------------|--------|------------------|-----|------|---------|
| FSam+FSol:0 d vs. FSol:20 d       | -359.3 | -2951 to 2233    | No  | ns   | >0.9999 |
| FSam+FSol:0 d vs. FSol:40 d       | -1488  | -4080 to 1104    | No  | ns   | >0.9999 |
| FSam+FSol:0 d vs. FSol:60 d       | -4608  | -7200 to -2016   | Yes | **** | <0.0001 |
| FSam+FSol:0 d vs. FSam+FSol:0 d   | 0      | -2592 to 2592    | No  | ns   | >0.9999 |
| FSam+FSol:0 d vs. FSam+FSol:20 d  | -1061  | -3653 to 1531    | No  | ns   | >0.9999 |
| FSam+FSol:0 d vs. FSam+FSol:40 d  | -5606  | -8198 to -3014   | Yes | **** | <0.0001 |
| FSam+FSol:0 d vs. FSam+FSol:60 d  | -19013 | -21605 to -16421 | Yes | **** | <0.0001 |
| FSam+FSol:20 d vs. FSam+FSol:40 d | -8892  | -11484 to -6300  | Yes | **** | <0.0001 |
| FSam+FSol:20 d vs. FSam+FSol:60 d | -36007 | -38599 to -33415 | Yes | **** | <0.0001 |
| FSam+FSol:20 d vs. Control:0 d    | 2050   | -542.4 to 4642   | No  | ns   | 0.8344  |
| FSam+FSol:20 d vs. Control:20 d   | 2050   | -542.4 to 4642   | No  | ns   | 0.8344  |
| FSam+FSol:20 d vs. Control:40 d   | 2050   | -542.4 to 4642   | No  | ns   | 0.8344  |
| FSam+FSol:20 d vs. Control:60 d   | 2050   | -542.4 to 4642   | No  | ns   | 0.8344  |
| FSam+FSol:20 d vs. FSam:0 d       | 2050   | -542.4 to 4642   | No  | ns   | 0.8344  |
| FSam+FSol:20 d vs. FSam:20 d      | 1330   | -1262 to 3922    | No  | ns   | >0.9999 |
| FSam+FSol:20 d vs. FSam:40 d      | -1695  | -4287 to 896.6   | No  | ns   | >0.9999 |
| FSam+FSol:20 d vs. FSam:60 d      | -6714  | -9306 to -4122   | Yes | **** | <0.0001 |
| FSam+FSol:20 d vs. FSol:0 d       | 2050   | -542.4 to 4642   | No  | ns   | 0.8344  |
| FSam+FSol:20 d vs. FSol:20 d      | 1690   | -901.6 to 4282   | No  | ns   | >0.9999 |
| FSam+FSol:20 d vs. FSol:40 d      | 561.5  | -2031 to 3154    | No  | ns   | >0.9999 |
| FSam+FSol:20 d vs. FSol:60 d      | -2559  | -5151 to 33.30   | No  | ns   | 0.06    |
| FSam+FSol:20 d vs. FSam+FSol:0 d  | 2050   | -542.4 to 4642   | No  | ns   | 0.8344  |
| FSam+FSol:20 d vs. FSam+FSol:20 d | 989    | -1603 to 3581    | No  | ns   | >0.9999 |
| FSam+FSol:20 d vs. FSam+FSol:40 d | -3556  | -6148 to -964.0  | Yes | ***  | 0.0002  |
| FSam+FSol:20 d vs. FSam+FSol:60 d | -16963 | -19555 to -14371 | Yes | **** | <0.0001 |
| FSam+FSol:40 d vs. FSam+FSol:60 d | -27115 | -29707 to -24523 | Yes | **** | <0.0001 |
| FSam+FSol:40 d vs. Control:0 d    | 10941  | 8349 to 13534    | Yes | **** | <0.0001 |
| FSam+FSol:40 d vs. Control:20 d   | 10941  | 8349 to 13534    | Yes | **** | <0.0001 |
| FSam+FSol:40 d vs. Control:40 d   | 10941  | 8349 to 13534    | Yes | **** | <0.0001 |
| FSam+FSol:40 d vs. Control:60 d   | 10941  | 8349 to 13534    | Yes | **** | <0.0001 |

|                                   |           |                 |     |      |         |
|-----------------------------------|-----------|-----------------|-----|------|---------|
| FSam+FSol:40 d vs. FSam:0 d       | 10941     | 8349 to 13534   | Yes | **** | <0.0001 |
| FSam+FSol:40 d vs. FSam:20 d      | 10222     | 7630 to 12814   | Yes | **** | <0.0001 |
| FSam+FSol:40 d vs. FSam:40 d      | 7196      | 4604 to 9788    | Yes | **** | <0.0001 |
| FSam+FSol:40 d vs. FSam:60 d      | 2178      | -414.0 to 4770  | No  | ns   | 0.4428  |
| FSam+FSol:40 d vs. FSol:0 d       | 10941     | 8349 to 13534   | Yes | **** | <0.0001 |
| FSam+FSol:40 d vs. FSol:20 d      | 10582     | 7990 to 13174   | Yes | **** | <0.0001 |
| FSam+FSol:40 d vs. FSol:40 d      | 9453      | 6861 to 12045   | Yes | **** | <0.0001 |
| FSam+FSol:40 d vs. FSol:60 d      | 6333      | 3741 to 8925    | Yes | **** | <0.0001 |
| FSam+FSol:40 d vs. FSam+FSol:0 d  | 10941     | 8349 to 13534   | Yes | **** | <0.0001 |
| FSam+FSol:40 d vs. FSam+FSol:20 d | 9881      | 7289 to 12473   | Yes | **** | <0.0001 |
| FSam+FSol:40 d vs. FSam+FSol:40 d | 5336      | 2744 to 7928    | Yes | **** | <0.0001 |
| FSam+FSol:40 d vs. FSam+FSol:60 d | -8072     | -10664 to -5480 | Yes | **** | <0.0001 |
| FSam+FSol:60 d vs. Control:0 d    | 38056     | 35464 to 40648  | Yes | **** | <0.0001 |
| FSam+FSol:60 d vs. Control:20 d   | 38056     | 35464 to 40648  | Yes | **** | <0.0001 |
| FSam+FSol:60 d vs. Control:40 d   | 38056     | 35464 to 40648  | Yes | **** | <0.0001 |
| FSam+FSol:60 d vs. Control:60 d   | 38056     | 35464 to 40648  | Yes | **** | <0.0001 |
| FSam+FSol:60 d vs. FSam:0 d       | 38056     | 35464 to 40648  | Yes | **** | <0.0001 |
| FSam+FSol:60 d vs. FSam:20 d      | 37337     | 34745 to 39929  | Yes | **** | <0.0001 |
| FSam+FSol:60 d vs. FSam:40 d      | 34311     | 31719 to 36903  | Yes | **** | <0.0001 |
| FSam+FSol:60 d vs. FSam:60 d      | 29293     | 26701 to 31885  | Yes | **** | <0.0001 |
| FSam+FSol:60 d vs. FSol:0 d       | 38056     | 35464 to 40648  | Yes | **** | <0.0001 |
| FSam+FSol:60 d vs. FSol:20 d      | 37697     | 35105 to 40289  | Yes | **** | <0.0001 |
| FSam+FSol:60 d vs. FSol:40 d      | 36568     | 33976 to 39160  | Yes | **** | <0.0001 |
| FSam+FSol:60 d vs. FSol:60 d      | 33448     | 30856 to 36040  | Yes | **** | <0.0001 |
| FSam+FSol:60 d vs. FSam+FSol:0 d  | 38056     | 35464 to 40648  | Yes | **** | <0.0001 |
| FSam+FSol:60 d vs. FSam+FSol:20 d | 36996     | 34404 to 39588  | Yes | **** | <0.0001 |
| FSam+FSol:60 d vs. FSam+FSol:40 d | 32451     | 29859 to 35043  | Yes | **** | <0.0001 |
| FSam+FSol:60 d vs. FSam+FSol:60 d | 19043     | 16451 to 21635  | Yes | **** | <0.0001 |
| Control:0 d vs. Control:20 d      | 3.638E-12 | -2592 to 2592   | No  | ns   | >0.9999 |

|                                 |            |                  |     |      |         |
|---------------------------------|------------|------------------|-----|------|---------|
| Control:0 d vs. Control:40 d    | -1.819E-12 | -2592 to 2592    | No  | ns   | >0.9999 |
| Control:0 d vs. Control:60 d    | 0          | -2592 to 2592    | No  | ns   | >0.9999 |
| Control:0 d vs. FSam:0 d        | 2.728E-12  | -2592 to 2592    | No  | ns   | >0.9999 |
| Control:0 d vs. FSam:20 d       | -719.2     | -3311 to 1873    | No  | ns   | >0.9999 |
| Control:0 d vs. FSam:40 d       | -3745      | -6337 to -1153   | Yes | **** | <0.0001 |
| Control:0 d vs. FSam:60 d       | -8763      | -11355 to -6171  | Yes | **** | <0.0001 |
| Control:0 d vs. FSol:0 d        | -2.728E-12 | -2592 to 2592    | No  | ns   | >0.9999 |
| Control:0 d vs. FSol:20 d       | -359.3     | -2951 to 2233    | No  | ns   | >0.9999 |
| Control:0 d vs. FSol:40 d       | -1488      | -4080 to 1104    | No  | ns   | >0.9999 |
| Control:0 d vs. FSol:60 d       | -4608      | -7200 to -2016   | Yes | **** | <0.0001 |
| Control:0 d vs. FSam+FSol:0 d   | 0          | -2592 to 2592    | No  | ns   | >0.9999 |
| Control:0 d vs. FSam+FSol:20 d  | -1061      | -3653 to 1531    | No  | ns   | >0.9999 |
| Control:0 d vs. FSam+FSol:40 d  | -5606      | -8198 to -3014   | Yes | **** | <0.0001 |
| Control:0 d vs. FSam+FSol:60 d  | -19013     | -21605 to -16421 | Yes | **** | <0.0001 |
| Control:20 d vs. Control:40 d   | -5.457E-12 | -2592 to 2592    | No  | ns   | >0.9999 |
| Control:20 d vs. Control:60 d   | -3.638E-12 | -2592 to 2592    | No  | ns   | >0.9999 |
| Control:20 d vs. FSam:0 d       | -9.095E-13 | -2592 to 2592    | No  | ns   | >0.9999 |
| Control:20 d vs. FSam:20 d      | -719.2     | -3311 to 1873    | No  | ns   | >0.9999 |
| Control:20 d vs. FSam:40 d      | -3745      | -6337 to -1153   | Yes | **** | <0.0001 |
| Control:20 d vs. FSam:60 d      | -8763      | -11355 to -6171  | Yes | **** | <0.0001 |
| Control:20 d vs. FSol:0 d       | -6.366E-12 | -2592 to 2592    | No  | ns   | >0.9999 |
| Control:20 d vs. FSol:20 d      | -359.3     | -2951 to 2233    | No  | ns   | >0.9999 |
| Control:20 d vs. FSol:40 d      | -1488      | -4080 to 1104    | No  | ns   | >0.9999 |
| Control:20 d vs. FSol:60 d      | -4608      | -7200 to -2016   | Yes | **** | <0.0001 |
| Control:20 d vs. FSam+FSol:0 d  | -3.638E-12 | -2592 to 2592    | No  | ns   | >0.9999 |
| Control:20 d vs. FSam+FSol:20 d | -1061      | -3653 to 1531    | No  | ns   | >0.9999 |
| Control:20 d vs. FSam+FSol:40 d | -5606      | -8198 to -3014   | Yes | **** | <0.0001 |

|                                 |            |                  |     |      |         |
|---------------------------------|------------|------------------|-----|------|---------|
| Control:20 d vs. FSam+FSol:60 d | -19013     | -21605 to -16421 | Yes | **** | <0.0001 |
| Control:40 d vs. Control:60 d   | 1.819E-12  | -2592 to 2592    | No  | ns   | >0.9999 |
| Control:40 d vs. FSam:0 d       | 4.547E-12  | -2592 to 2592    | No  | ns   | >0.9999 |
| Control:40 d vs. FSam:20 d      | -719.2     | -3311 to 1873    | No  | ns   | >0.9999 |
| Control:40 d vs. FSam:40 d      | -3745      | -6337 to -1153   | Yes | **** | <0.0001 |
| Control:40 d vs. FSam:60 d      | -8763      | -11355 to -6171  | Yes | **** | <0.0001 |
| Control:40 d vs. FSol:0 d       | -9.095E-13 | -2592 to 2592    | No  | ns   | >0.9999 |
| Control:40 d vs. FSol:20 d      | -359.3     | -2951 to 2233    | No  | ns   | >0.9999 |
| Control:40 d vs. FSol:40 d      | -1488      | -4080 to 1104    | No  | ns   | >0.9999 |
| Control:40 d vs. FSol:60 d      | -4608      | -7200 to -2016   | Yes | **** | <0.0001 |
| Control:40 d vs. FSam+FSol:0 d  | 1.819E-12  | -2592 to 2592    | No  | ns   | >0.9999 |
| Control:40 d vs. FSam+FSol:20 d | -1061      | -3653 to 1531    | No  | ns   | >0.9999 |
| Control:40 d vs. FSam+FSol:40 d | -5606      | -8198 to -3014   | Yes | **** | <0.0001 |
| Control:40 d vs. FSam+FSol:60 d | -19013     | -21605 to -16421 | Yes | **** | <0.0001 |
| Control:60 d vs. FSam:0 d       | 2.728E-12  | -2592 to 2592    | No  | ns   | >0.9999 |
| Control:60 d vs. FSam:20 d      | -719.2     | -3311 to 1873    | No  | ns   | >0.9999 |
| Control:60 d vs. FSam:40 d      | -3745      | -6337 to -1153   | Yes | **** | <0.0001 |
| Control:60 d vs. FSam:60 d      | -8763      | -11355 to -6171  | Yes | **** | <0.0001 |
| Control:60 d vs. FSol:0 d       | -2.728E-12 | -2592 to 2592    | No  | ns   | >0.9999 |
| Control:60 d vs. FSol:20 d      | -359.3     | -2951 to 2233    | No  | ns   | >0.9999 |
| Control:60 d vs. FSol:40 d      | -1488      | -4080 to 1104    | No  | ns   | >0.9999 |
| Control:60 d vs. FSol:60 d      | -4608      | -7200 to -2016   | Yes | **** | <0.0001 |
| Control:60 d vs. FSam+FSol:0 d  | 0          | -2592 to 2592    | No  | ns   | >0.9999 |
| Control:60 d vs. FSam+FSol:20 d | -1061      | -3653 to 1531    | No  | ns   | >0.9999 |
| Control:60 d vs. FSam+FSol:40 d | -5606      | -8198 to -3014   | Yes | **** | <0.0001 |
| Control:60 d vs. FSam+FSol:60 d | -19013     | -21605 to -16421 | Yes | **** | <0.0001 |
| FSam:0 d vs. FSam:20 d          | -719.2     | -3311 to 1873    | No  | ns   | >0.9999 |
| FSam:0 d vs. FSam:40 d          | -3745      | -6337 to -1153   | Yes | **** | <0.0001 |
| FSam:0 d vs. FSam:60 d          | -8763      | -11355 to -6171  | Yes | **** | <0.0001 |



|                              |            |                  |     |      |         |
|------------------------------|------------|------------------|-----|------|---------|
| FSam:0 d vs. FSol:0 d        | -5.457E-12 | -2592 to 2592    | No  | ns   | >0.9999 |
| FSam:0 d vs. FSol:20 d       | -359.3     | -2951 to 2233    | No  | ns   | >0.9999 |
| FSam:0 d vs. FSol:40 d       | -1488      | -4080 to 1104    | No  | ns   | >0.9999 |
| FSam:0 d vs. FSol:60 d       | -4608      | -7200 to -2016   | Yes | **** | <0.0001 |
| FSam:0 d vs. FSam+FSol:0 d   | -2.728E-12 | -2592 to 2592    | No  | ns   | >0.9999 |
| FSam:0 d vs. FSam+FSol:20 d  | -1061      | -3653 to 1531    | No  | ns   | >0.9999 |
| FSam:0 d vs. FSam+FSol:40 d  | -5606      | -8198 to -3014   | Yes | **** | <0.0001 |
| FSam:0 d vs. FSam+FSol:60 d  | -19013     | -21605 to -16421 | Yes | **** | <0.0001 |
| FSam:20 d vs. FSam:40 d      | -3026      | -5618 to -433.8  | Yes | **   | 0.0042  |
| FSam:20 d vs. FSam:60 d      | -8044      | -10636 to -5452  | Yes | **** | <0.0001 |
| FSam:20 d vs. FSol:0 d       | 719.2      | -1873 to 3311    | No  | ns   | >0.9999 |
| FSam:20 d vs. FSol:20 d      | 360        | -2232 to 2952    | No  | ns   | >0.9999 |
| FSam:20 d vs. FSol:40 d      | -768.9     | -3361 to 1823    | No  | ns   | >0.9999 |
| FSam:20 d vs. FSol:60 d      | -3889      | -6481 to -1297   | Yes | **** | <0.0001 |
| FSam:20 d vs. FSam+FSol:0 d  | 719.2      | -1873 to 3311    | No  | ns   | >0.9999 |
| FSam:20 d vs. FSam+FSol:20 d | -341.5     | -2934 to 2251    | No  | ns   | >0.9999 |
| FSam:20 d vs. FSam+FSol:40 d | -4887      | -7479 to -2294   | Yes | **** | <0.0001 |
| FSam:20 d vs. FSam+FSol:60 d | -18294     | -20886 to -15702 | Yes | **** | <0.0001 |
| FSam:40 d vs. FSam:60 d      | -5018      | -7610 to -2426   | Yes | **** | <0.0001 |
| FSam:40 d vs. FSol:0 d       | 3745       | 1153 to 6337     | Yes | **** | <0.0001 |
| FSam:40 d vs. FSol:20 d      | 3386       | 793.8 to 5978    | Yes | ***  | 0.0005  |
| FSam:40 d vs. FSol:40 d      | 2257       | -335.1 to 4849   | No  | ns   | 0.2969  |
| FSam:40 d vs. FSol:60 d      | -863.3     | -3455 to 1729    | No  | ns   | >0.9999 |
| FSam:40 d vs. FSam+FSol:0 d  | 3745       | 1153 to 6337     | Yes | **** | <0.0001 |
| FSam:40 d vs. FSam+FSol:20 d | 2684       | 92.36 to 5276    | Yes | *    | 0.03    |
| FSam:40 d vs. FSam+FSol:40 d | -1861      | -4453 to 731.4   | No  | ns   | >0.9999 |
| FSam:40 d vs. FSam+FSol:60 d | -15268     | -17860 to -12676 | Yes | **** | <0.0001 |
| FSam:60 d vs. FSol:0 d       | 8763       | 6171 to 11355    | Yes | **** | <0.0001 |
| FSam:60 d vs. FSol:20 d      | 8404       | 5812 to 10996    | Yes | **** | <0.0001 |
| FSam:60 d vs. FSol:40 d      | 7275       | 4683 to 9867     | Yes | **** | <0.0001 |
| FSam:60 d vs. FSol:60 d      | 4155       | 1563 to 6747     | Yes | **** | <0.0001 |
| FSam:60 d vs. FSam+FSol:0 d  | 8763       | 6171 to 11355    | Yes | **** | <0.0001 |
| FSam:60 d vs. FSam+FSol:20 d | 7703       | 5111 to 10295    | Yes | **** | <0.0001 |
| FSam:60 d vs. FSam+FSol:40 d | 3158       | 565.5 to 5750    | Yes | **   | 0.0019  |

|                                   |           |                  |     |      |         |
|-----------------------------------|-----------|------------------|-----|------|---------|
| FSam:60 d vs. FSam+FSol:60 d      | -10250    | -12842 to -7658  | Yes | **** | <0.0001 |
| FSol:0 d vs. FSol:20 d            | -359.3    | -2951 to 2233    | No  | ns   | >0.9999 |
| FSol:0 d vs. FSol:40 d            | -1488     | -4080 to 1104    | No  | ns   | >0.9999 |
| FSol:0 d vs. FSol:60 d            | -4608     | -7200 to -2016   | Yes | **** | <0.0001 |
| FSol:0 d vs. FSam+FSol:0 d        | 2.728E-12 | -2592 to 2592    | No  | ns   | >0.9999 |
| FSol:0 d vs. FSam+FSol:20 d       | -1061     | -3653 to 1531    | No  | ns   | >0.9999 |
| FSol:0 d vs. FSam+FSol:40 d       | -5606     | -8198 to -3014   | Yes | **** | <0.0001 |
| FSol:0 d vs. FSam+FSol:60 d       | -19013    | -21605 to -16421 | Yes | **** | <0.0001 |
| FSol:20 d vs. FSol:40 d           | -1129     | -3721 to 1463    | No  | ns   | >0.9999 |
| FSol:20 d vs. FSol:60 d           | -4249     | -6841 to -1657   | Yes | **** | <0.0001 |
| FSol:20 d vs. FSam+FSol:0 d       | 359.3     | -2233 to 2951    | No  | ns   | >0.9999 |
| FSol:20 d vs. FSam+FSol:20 d      | -701.4    | -3293 to 1891    | No  | ns   | >0.9999 |
| FSol:20 d vs. FSam+FSol:40 d      | -5247     | -7839 to -2654   | Yes | **** | <0.0001 |
| FSol:20 d vs. FSam+FSol:60 d      | -18654    | -21246 to -16062 | Yes | **** | <0.0001 |
| FSol:40 d vs. FSol:60 d           | -3120     | -5712 to -528.2  | Yes | **   | 0.0024  |
| FSol:40 d vs. FSam+FSol:0 d       | 1488      | -1104 to 4080    | No  | ns   | >0.9999 |
| FSol:40 d vs. FSam+FSol:20 d      | 427.5     | -2165 to 3020    | No  | ns   | >0.9999 |
| FSol:40 d vs. FSam+FSol:40 d      | -4118     | -6710 to -1526   | Yes | **** | <0.0001 |
| FSol:40 d vs. FSam+FSol:60 d      | -17525    | -20117 to -14933 | Yes | **** | <0.0001 |
| FSol:60 d vs. FSam+FSol:0 d       | 4608      | 2016 to 7200     | Yes | **** | <0.0001 |
| FSol:60 d vs. FSam+FSol:20 d      | 3548      | 955.7 to 6140    | Yes | ***  | 0.0002  |
| FSol:60 d vs. FSam+FSol:40 d      | -997.3    | -3589 to 1595    | No  | ns   | >0.9999 |
| FSol:60 d vs. FSam+FSol:60 d      | -14405    | -16997 to -11813 | Yes | **** | <0.0001 |
| FSam+FSol:0 d vs. FSam+FSol:20 d  | -1061     | -3653 to 1531    | No  | ns   | >0.9999 |
| FSam+FSol:0 d vs. FSam+FSol:40 d  | -5606     | -8198 to -3014   | Yes | **** | <0.0001 |
| FSam+FSol:0 d vs. FSam+FSol:60 d  | -19013    | -21605 to -16421 | Yes | **** | <0.0001 |
| FSam+FSol:20 d vs. FSam+FSol:40 d | -4545     | -7137 to -1953   | Yes | **** | <0.0001 |
| FSam+FSol:20 d vs. FSam+FSol:60 d | -17952    | -20544 to -15360 | Yes | **** | <0.0001 |
| FSam+FSol:40 d vs. FSam+FSol:60 d | -13407    | -15999 to -10815 | Yes | **** | <0.0001 |

Table S6: Tukey multiple comparison test for starch content of Kufri Jyoti and Kufri Frysona when infected with control (water agar), *Fusarium Sambucinum*, *Fusarium solani* and *Fusarium Sambucinum* + *Fusarium solani* and incubated for 0 d, 20 d, 40 d and 60 days

| Tukey's multiple comparisons test | Significant? | Summary | Adjusted P Value |
|-----------------------------------|--------------|---------|------------------|
| control                           |              |         |                  |
| 0 d vs. 20 d                      | No           | ns      | 0.9644           |
| 0 d vs. 40 d                      | No           | ns      | 0.9948           |
| 0 d vs. 60 d                      | No           | ns      | 0.3806           |
| 20 d vs. 40 d                     | No           | ns      | 0.9957           |
| 20 d vs. 60 d                     | No           | ns      | 0.1692           |
| 40 d vs. 60 d                     | No           | ns      | 0.2577           |
| Fsam                              |              |         |                  |
| 0 d vs. 20 d                      | No           | ns      | 0.9968           |
| 0 d vs. 40 d                      | Yes          | ***     | 0.0002           |
| 0 d vs. 60 d                      | Yes          | ****    | <0.0001          |
| 20 d vs. 40 d                     | Yes          | ***     | 0.0004           |
| 20 d vs. 60 d                     | Yes          | ****    | <0.0001          |
| 40 d vs. 60 d                     | Yes          | ****    | <0.0001          |
| Fsol                              |              |         |                  |
| 0 d vs. 20 d                      | No           | ns      | 0.6094           |
| 0 d vs. 40 d                      | No           | ns      | 0.1843           |
| 0 d vs. 60 d                      | Yes          | *       | 0.0126           |
| 20 d vs. 40 d                     | Yes          | **      | 0.0091           |
| 20 d vs. 60 d                     | Yes          | ***     | 0.0002           |
| 40 d vs. 60 d                     | No           | ns      | 0.6794           |
| FSam+FSol                         |              |         |                  |
| 0 d vs. 20 d                      | No           | ns      | 0.948            |
| 0 d vs. 40 d                      | Yes          | *       | 0.0197           |
| 0 d vs. 60 d                      | Yes          | ****    | <0.0001          |
| 20 d vs. 40 d                     | Yes          | **      | 0.0041           |
| 20 d vs. 60 d                     | Yes          | ****    | <0.0001          |
| 40 d vs. 60 d                     | Yes          | ****    | <0.0001          |
| control                           |              |         |                  |
| 0 d vs. 20 d                      | No           | ns      | 0.9013           |
| 0 d vs. 40 d                      | No           | ns      | 0.2524           |
| 0 d vs. 60 d                      | Yes          | **      | 0.0048           |
| 20 d vs. 40 d                     | No           | ns      | 0.6422           |
| 20 d vs. 60 d                     | Yes          | *       | 0.0336           |
| 40 d vs. 60 d                     | No           | ns      | 0.3761           |
| Fsam                              |              |         |                  |
| 0 d vs. 20 d                      | Yes          | *       | 0.0138           |
| 0 d vs. 40 d                      | Yes          | ****    | <0.0001          |
| 0 d vs. 60 d                      | Yes          | ****    | <0.0001          |

|               |     |      |         |
|---------------|-----|------|---------|
| 20 d vs. 40 d | Yes | **** | <0.0001 |
| 20 d vs. 60 d | Yes | **** | <0.0001 |
| 40 d vs. 60 d | Yes | ***  | 0.0007  |
|               |     |      |         |
| Fsol          |     |      |         |
| 0 d vs. 20 d  | Yes | **** | <0.0001 |
| 0 d vs. 40 d  | Yes | **** | <0.0001 |
| 0 d vs. 60 d  | Yes | **** | <0.0001 |
| 20 d vs. 40 d | Yes | ***  | 0.001   |
| 20 d vs. 60 d | Yes | **** | <0.0001 |
| 40 d vs. 60 d | No  | ns   | 0.1407  |
|               |     |      |         |
| FSam+FSol     |     |      |         |
| 0 d vs. 20 d  | Yes | **** | <0.0001 |
| 0 d vs. 40 d  | Yes | **** | <0.0001 |
| 0 d vs. 60 d  | Yes | **** | <0.0001 |
| 20 d vs. 40 d | No  | ns   | 0.0716  |
| 20 d vs. 60 d | Yes | **** | <0.0001 |
| 40 d vs. 60 d | Yes | ***  | 0.0004  |

Table S7: Tukey multiple comparison test for Glycemic index of Kufri Jyoti and Kufri Frysona when infected with control (water agar), *Fusarium Sambucinum*, *Fusarium solani* and *Fusarium Sambucinum* + *Fusarium solani* and incubated for 0 d, 20 d, 40 d and 60 days

| Tukey's multiple comparisons test | Mean Diff. | 95.00% CI of diff. | Significant? | Summary | Adjusted P Value |
|-----------------------------------|------------|--------------------|--------------|---------|------------------|
| 0 d                               |            |                    |              |         |                  |
| Control vs. FSam                  | -2.533     | -3.645 to -1.421   | Yes          | ***     | <.001            |
| Control vs. FSol                  | -1.393     | -2.505 to -0.2814  | Yes          | **      | 0.005            |
| Control vs. FSam+FSol             | -2.717     | -3.829 to -1.605   | Yes          | ***     | <.001            |
| Control vs. Control               | -7.413     | -8.525 to -6.301   | Yes          | ***     | <.001            |
| Control vs. FSam                  | -8.817     | -9.929 to -7.705   | Yes          | ***     | <.001            |
| Control vs. FSol                  | -7.893     | -9.005 to -6.781   | Yes          | ***     | <.001            |
| Control vs. FSam+FSol             | -9.813     | -10.93 to -8.701   | Yes          | ***     | <.001            |
| FSam vs. FSol                     | 1.14       | 0.02803 to 2.252   | Yes          | *       | 0.041            |
| FSam vs. FSam+FSol                | -0.1833    | -1.295 to 0.9286   | No           | ns      | >.999            |
| FSam vs. Control                  | -4.88      | -5.992 to -3.768   | Yes          | ***     | <.001            |
| FSam vs. FSam                     | -6.283     | -7.395 to -5.171   | Yes          | ***     | <.001            |
| FSam vs. FSol                     | -5.36      | -6.472 to -4.248   | Yes          | ***     | <.001            |
| FSam vs. FSam+FSol                | -7.28      | -8.392 to -6.168   | Yes          | ***     | <.001            |
| FSol vs. FSam+FSol                | -1.323     | -2.435 to -0.2114  | Yes          | **      | 0.009            |
| FSol vs. Control                  | -6.02      | -7.132 to -4.908   | Yes          | ***     | <.001            |

|                         |         |                   |     |     |       |
|-------------------------|---------|-------------------|-----|-----|-------|
| FSol vs. FSam           | -7.423  | -8.535 to -6.311  | Yes | *** | <.001 |
| FSol vs. FSol           | -6.5    | -7.612 to -5.388  | Yes | *** | <.001 |
| FSol vs. FSam+FSol      | -8.42   | -9.532 to -7.308  | Yes | *** | <.001 |
| FSam+FSol vs. Control   | -4.697  | -5.809 to -3.585  | Yes | *** | <.001 |
| FSam+FSol vs. FSam      | -6.1    | -7.212 to -4.988  | Yes | *** | <.001 |
| FSam+FSol vs. FSol      | -5.177  | -6.289 to -4.065  | Yes | *** | <.001 |
| FSam+FSol vs. FSam+FSol | -7.097  | -8.209 to -5.985  | Yes | *** | <.001 |
| Control vs. FSam        | -1.403  | -2.515 to -0.2914 | Yes | **  | 0.005 |
| Control vs. FSol        | -0.48   | -1.592 to 0.6320  | No  | ns  | 0.875 |
| Control vs. FSam+FSol   | -2.4    | -3.512 to -1.288  | Yes | *** | <.001 |
| FSam vs. FSol           | 0.9233  | -0.1886 to 2.035  | No  | ns  | 0.174 |
| FSam vs. FSam+FSol      | -0.9967 | -2.109 to 0.1153  | No  | ns  | 0.111 |
| FSol vs. FSam+FSol      | -1.92   | -3.032 to -0.8080 | Yes | *** | <.001 |
|                         |         |                   |     |     |       |
| 20 d                    |         |                   |     |     |       |
| Control vs. FSam        | -2.807  | -3.919 to -1.695  | Yes | *** | <.001 |
| Control vs. FSol        | -1.687  | -2.799 to -0.5747 | Yes | *** | <.001 |
| Control vs. FSam+FSol   | -3.687  | -4.799 to -2.575  | Yes | *** | <.001 |
| Control vs. Control     | -7.143  | -8.255 to -6.031  | Yes | *** | <.001 |
| Control vs. FSam        | -8.92   | -10.03 to -7.808  | Yes | *** | <.001 |
| Control vs. FSol        | -8.157  | -9.269 to -7.045  | Yes | *** | <.001 |
| Control vs. FSam+FSol   | -10.94  | -12.05 to -9.825  | Yes | *** | <.001 |
| FSam vs. FSol           | 1.12    | 0.008027 to 2.232 | Yes | *   | 0.047 |
| FSam vs. FSam+FSol      | -0.88   | -1.992 to 0.2320  | No  | ns  | 0.223 |
| FSam vs. Control        | -4.337  | -5.449 to -3.225  | Yes | *** | <.001 |
| FSam vs. FSam           | -6.113  | -7.225 to -5.001  | Yes | *** | <.001 |
| FSam vs. FSol           | -5.35   | -6.462 to -4.238  | Yes | *** | <.001 |
| FSam vs. FSam+FSol      | -8.13   | -9.242 to -7.018  | Yes | *** | <.001 |
| FSol vs. FSam+FSol      | -2      | -3.112 to -0.8880 | Yes | *** | <.001 |
| FSol vs. Control        | -5.457  | -6.569 to -4.345  | Yes | *** | <.001 |
| FSol vs. FSam           | -7.233  | -8.345 to -6.121  | Yes | *** | <.001 |
| FSol vs. FSol           | -6.47   | -7.582 to -5.358  | Yes | *** | <.001 |
| FSol vs. FSam+FSol      | -9.25   | -10.36 to -8.138  | Yes | *** | <.001 |
| FSam+FSol vs. Control   | -3.457  | -4.569 to -2.345  | Yes | *** | <.001 |
| FSam+FSol vs. FSam      | -5.233  | -6.345 to -4.121  | Yes | *** | <.001 |
| FSam+FSol vs. FSol      | -4.47   | -5.582 to -3.358  | Yes | *** | <.001 |
| FSam+FSol vs. FSam+FSol | -7.25   | -8.362 to -6.138  | Yes | *** | <.001 |

|                         |         |                   |     |     |       |
|-------------------------|---------|-------------------|-----|-----|-------|
| Control vs. FSam        | -1.777  | -2.889 to -0.6647 | Yes | *** | <.001 |
| Control vs. FSol        | -1.013  | -2.125 to 0.09864 | No  | ns  | 0.1   |
| Control vs. FSam+FSol   | -3.793  | -4.905 to -2.681  | Yes | *** | <.001 |
| FSam vs. FSol           | 0.7633  | -0.3486 to 1.875  | No  | ns  | 0.395 |
| FSam vs. FSam+FSol      | -2.017  | -3.129 to -0.9047 | Yes | *** | <.001 |
| FSol vs. FSam+FSol      | -2.78   | -3.892 to -1.668  | Yes | *** | <.001 |
|                         |         |                   |     |     |       |
| 40 d                    |         |                   |     |     |       |
| Control vs. FSam        | -2      | -3.112 to -0.8880 | Yes | *** | <.001 |
| Control vs. FSol        | -1.587  | -2.699 to -0.4747 | Yes | *** | <.001 |
| Control vs. FSam+FSol   | -2.963  | -4.075 to -1.851  | Yes | *** | <.001 |
| Control vs. Control     | -5.897  | -7.009 to -4.785  | Yes | *** | <.001 |
| Control vs. FSam        | -8.747  | -9.859 to -7.635  | Yes | *** | <.001 |
| Control vs. FSol        | -7.197  | -8.309 to -6.085  | Yes | *** | <.001 |
| Control vs. FSam+FSol   | -9.79   | -10.90 to -8.678  | Yes | *** | <.001 |
| FSam vs. FSol           | 0.4133  | -0.6986 to 1.525  | No  | ns  | 0.939 |
| FSam vs. FSam+FSol      | -0.9633 | -2.075 to 0.1486  | No  | ns  | 0.137 |
| FSam vs. Control        | -3.897  | -5.009 to -2.785  | Yes | *** | <.001 |
| FSam vs. FSam           | -6.747  | -7.859 to -5.635  | Yes | *** | <.001 |
| FSam vs. FSol           | -5.197  | -6.309 to -4.085  | Yes | *** | <.001 |
| FSam vs. FSam+FSol      | -7.79   | -8.902 to -6.678  | Yes | *** | <.001 |
| FSol vs. FSam+FSol      | -1.377  | -2.489 to -0.2647 | Yes | **  | 0.006 |
| FSol vs. Control        | -4.31   | -5.422 to -3.198  | Yes | *** | <.001 |
| FSol vs. FSam           | -7.16   | -8.272 to -6.048  | Yes | *** | <.001 |
| FSol vs. FSol           | -5.61   | -6.722 to -4.498  | Yes | *** | <.001 |
| FSol vs. FSam+FSol      | -8.203  | -9.315 to -7.091  | Yes | *** | <.001 |
| FSam+FSol vs. Control   | -2.933  | -4.045 to -1.821  | Yes | *** | <.001 |
| FSam+FSol vs. FSam      | -5.783  | -6.895 to -4.671  | Yes | *** | <.001 |
| FSam+FSol vs. FSol      | -4.233  | -5.345 to -3.121  | Yes | *** | <.001 |
| FSam+FSol vs. FSam+FSol | -6.827  | -7.939 to -5.715  | Yes | *** | <.001 |
| Control vs. FSam        | -2.85   | -3.962 to -1.738  | Yes | *** | <.001 |
| Control vs. FSol        | -1.3    | -2.412 to -0.1880 | Yes | *   | 0.011 |
| Control vs. FSam+FSol   | -3.893  | -5.005 to -2.781  | Yes | *** | <.001 |
| FSam vs. FSol           | 1.55    | 0.4380 to 2.662   | Yes | **  | 0.001 |
| FSam vs. FSam+FSol      | -1.043  | -2.155 to 0.06864 | No  | ns  | 0.081 |
| FSol vs. FSam+FSol      | -2.593  | -3.705 to -1.481  | Yes | *** | <.001 |
|                         |         |                   |     |     |       |

|                         |         |                   |     |     |       |
|-------------------------|---------|-------------------|-----|-----|-------|
| 60 d                    |         |                   |     |     |       |
| Control vs. FSam        | -1.94   | -3.052 to -0.8280 | Yes | *** | <.001 |
| Control vs. FSol        | -1.213  | -2.325 to -0.1014 | Yes | *   | 0.023 |
| Control vs. FSam+FSol   | -2.737  | -3.849 to -1.625  | Yes | *** | <.001 |
| Control vs. Control     | -5.11   | -6.222 to -3.998  | Yes | *** | <.001 |
| Control vs. FSam        | -7.787  | -8.899 to -6.675  | Yes | *** | <.001 |
| Control vs. FSol        | -7.3    | -8.412 to -6.188  | Yes | *** | <.001 |
| Control vs. FSam+FSol   | -8.757  | -9.869 to -7.645  | Yes | *** | <.001 |
| FSam vs. FSol           | 0.7267  | -0.3853 to 1.839  | No  | ns  | 0.459 |
| FSam vs. FSam+FSol      | -0.7967 | -1.909 to 0.3153  | No  | ns  | 0.34  |
| FSam vs. Control        | -3.17   | -4.282 to -2.058  | Yes | *** | <.001 |
| FSam vs. FSam           | -5.847  | -6.959 to -4.735  | Yes | *** | <.001 |
| FSam vs. FSol           | -5.36   | -6.472 to -4.248  | Yes | *** | <.001 |
| FSam vs. FSam+FSol      | -6.817  | -7.929 to -5.705  | Yes | *** | <.001 |
| FSol vs. FSam+FSol      | -1.523  | -2.635 to -0.4114 | Yes | **  | 0.001 |
| FSol vs. Control        | -3.897  | -5.009 to -2.785  | Yes | *** | <.001 |
| FSol vs. FSam           | -6.573  | -7.685 to -5.461  | Yes | *** | <.001 |
| FSol vs. FSol           | -6.087  | -7.199 to -4.975  | Yes | *** | <.001 |
| FSol vs. FSam+FSol      | -7.543  | -8.655 to -6.431  | Yes | *** | <.001 |
| FSam+FSol vs. Control   | -2.373  | -3.485 to -1.261  | Yes | *** | <.001 |
| FSam+FSol vs. FSam      | -5.05   | -6.162 to -3.938  | Yes | *** | <.001 |
| FSam+FSol vs. FSol      | -4.563  | -5.675 to -3.451  | Yes | *** | <.001 |
| FSam+FSol vs. FSam+FSol | -6.02   | -7.132 to -4.908  | Yes | *** | <.001 |
| Control vs. FSam        | -2.677  | -3.789 to -1.565  | Yes | *** | <.001 |
| Control vs. FSol        | -2.19   | -3.302 to -1.078  | Yes | *** | <.001 |
| Control vs. FSam+FSol   | -3.647  | -4.759 to -2.535  | Yes | *** | <.001 |
| FSam vs. FSol           | 0.4867  | -0.6253 to 1.599  | No  | ns  | 0.867 |
| FSam vs. FSam+FSol      | -0.97   | -2.082 to 0.1420  | No  | ns  | 0.131 |
| FSol vs. FSam+FSol      | -1.457  | -2.569 to -0.3447 | Yes | **  | 0.003 |
